# Supplementary material
Source: PubMed Central journal article supplement (PMC263827)
Supplement: pnas_100_23_13407__1.pdf [file pnas_100_23_13407__1.pdf]

**Table 3. MADS-box sequences detected in the *Arabidopsis thaliana* genome**

| Gene name, symbol, and synonyms | Accession no.                  | Gene ID   | BAC no. identifier (ORF number) | Chromosome | Predicted number of exons | Type of sister paralogon duplication * | Comments and references for functional studies |
|---------------------------------|--------------------------------|-----------|---------------------------------|------------|---------------------------|----------------------------------------|------------------------------------------------|
| AGAMOUS / AG                    | AL021711 / AL161549            | At4g18960 | F13C5.130                       | 4          | 8                         | Interchromosomal †                     | 1                                              |
| APETALA3 / AP3                  | AL132971 / AY070397            | At3g54340 | T12E18_30                       | 3          | 7                         | Not duplicated in sister region        | 2                                              |
| PISTILLATA / PI                 | AB035137                       | At5g20240 | F5O24.130                       | 5          | 6                         | Not duplicated in sister region        | 3                                              |
| AGL1/ SHATTERPROOF1 / SHP1      | AL353032                       | At3g58780 | T20N10.130                      | 3          | 7                         | Interchromosomal                       | 4                                              |
| AGL2 / SEPALLATA1 / SEP1        | M55551                         | At5g15800 | F14F8.180                       | 5          | 7                         | Interchromosomal                       | 4, 5                                           |
| AGL3                            | AC006836                       | At2g03710 | F19B11.16                       | 2          | 8                         | Intrachromosomal                       | 4                                              |
| AGL4/ SEPALLATA2                | AC009755                       | At3g02310 | F14P3.4                         | 3          | 7                         | Interchromosomal                       | 4, 5                                           |
| AGL5 / SHATTERPROOF2 / SHP2     | AC006931                       | At2g42830 | F7D19.17                        | 2          | 7                         | Interchromosomal                       | 4, 6                                           |
| AGL6                            | AC003680                       | At2g45650 | F17K2.18                        | 2          | 8                         | Interchromosomal                       | 4                                              |
| AGL7/ APETALA1 / AP1            | AC008262                       | At1g69120 | F4N2.9                          | 1          | 8                         | Intrachromosomal                       | 7                                              |
| AGL8/ FRUITFULL / FUL           | AB008269                       | At5g60910 | MSL3.3                          | 5          | 8                         | Interchromosomal †                     | 8                                              |
| AGL9/ SEPALLATA3 / SEP3         | AC002396                       | At1g24260 | F3I6.19                         | 1          | 8                         | Intrachromosomal †                     | 5                                              |
| AGL10/ CAULIFLOWER / CAL        | P5K112                         | At1g26310 | F28B23.25                       | 1          | 8                         | Intrachromosomal                       | 9                                              |
| AGL11                           | AL049481 / AL161516            | At4g09960 | T5L19.90                        | 4          | 7                         | Interchromosomal                       | 10                                             |
| AGL12                           | AC012654 / AL016163            | At1g71692 | F14O23.5                        | 1          | 7                         | Interchromosomal                       | 10, 11                                         |
| AGL13                           | AL137898                       | At3g61120 | T20K12.20                       | 3          | 8                         | Interchromosomal                       | 10                                             |
| AGL14                           | AL078606 / AL161531 / AL161533 | At4g11880 | T26M18.90                       | 4          | 7                         | Intrachromosomal                       | 10                                             |

| Gene name, symbol, and synonyms                                         | Accession no.       | Gene ID   | BAC no. identifier (ORF number) | Chromosome | Predicted number of exons | Type of sister paralogon duplication * | Comments and references for functional studies |
|-------------------------------------------------------------------------|---------------------|-----------|---------------------------------|------------|---------------------------|----------------------------------------|------------------------------------------------|
| AGL15                                                                   | AB005230            | At5g13790 | MXE10.8                         | 5          | 8                         | Not duplicated is sister region        | 10                                             |
| AGL16                                                                   | AL137080            | At3g57230 | F28O9.80                        | 3          | 6                         | Not duplicated is sister region        | 12                                             |
| AGL17                                                                   | AC006340            | At2g22630 | T9I22.7                         | 2          | 7                         | Interchromosomal                       | 11                                             |
| AGL18                                                                   | AL137080 / AF312663 | At3g57390 | F28O9.240                       | 3          | 8                         | Intrachromosomal †                     | 12, ‡                                          |
| AGL19                                                                   | AL031018 / AL161558 | At4g22950 | F7H19.130                       | 4          | 7                         | Intrachromosomal                       | 12                                             |
| AGL20/<br>SUPPRESSOR OF<br>OVEREXPRESSION OF<br>CONSTANS1<br>/ SOC1     | AC003680            | At2g45660 | F17K2.19                        | 2          | 7                         | Not duplicated is sister region        | 13, 14                                         |
| AGL21                                                                   | AL035538 / AL161592 | At4g37940 | F20D10.60                       | 4          | 7                         | Interchromosomal                       | 11                                             |
| AGL22/ SHORT<br>VEGETATIVE<br>PHASE / SVP                               | AC006592            | At2g22540 | F14M13.6                        | 2          | 6                         | Interchromosomal †                     | 15                                             |
| AGL23                                                                   | AC004512            | At1g65360 | T8F5.14                         | 1          | 1                         | Not duplicated is sister region        |                                                |
| AGL24                                                                   | AL035356 / AL161561 | At4g24540 | F22K18.260                      | 4          | 8                         | Interchromosomal †                     | 16, 17                                         |
| AGL25/<br>FLOWERING<br>LOCUS C /<br>FLOWERING<br>LOCUS F / FLC /<br>FLM | AF116528 / AL356332 | At5g10140 | T31P16_130                      | 5          | 7                         | Intrachromosomal                       | 18, 19                                         |
| AGL26                                                                   | AF007270            | At5g26870 | F2P16.19                        | 5          | 1                         | Not duplicated is sister region        |                                                |
| AGL27 /<br>FLOWERING<br>LOCUS M / FLM<br>/FK1 / MAF1                    | AC002291            | At1g77080 | F22K20.15                       | 1          | 6                         | Not duplicated is sister region        | 12, 20, §                                      |
| AGL28                                                                   | Y12776 / AC061957   | At1g01530 | F22L4.7                         | 1          | 2                         | Not duplicated is sister region        |                                                |
| AGL29                                                                   | AC004077            | At2g34440 | T31E10.22<br>(=F13P17.1)        | 2          | 2                         | Interchromosomal †                     | ¶                                              |

| Gene name, symbol, and synonyms                  | Accession no.          | Gene ID   | BAC no. identifier (ORF number) | Chromosome | Predicted number of exons | Type of sister paralogon duplication * | Comments and references for functional studies |
|--------------------------------------------------|------------------------|-----------|---------------------------------|------------|---------------------------|----------------------------------------|------------------------------------------------|
| AGL30                                            | AC004138               | At2g03060 | T17M13.23                       | 2          | 6                         | Not duplicated is sister region        |                                                |
| AGL31 / MAF2-I                                   | AB019236 /             | At5g65050 | MXK3.30                         | 5          | 6                         | Not duplicated is sister region        | 12, 21,                                        |
| AGL32 / TRANSPARENT TESTA 16 / TT16              | AB007648               | At5g23260 | MKD15.12                        | 5          | 5                         | Not duplicated is sister region.       | 22                                             |
| AGL33                                            | AC004484               | At2g26320 | T1D16.4                         | 2          | 2                         | Not duplicated is sister region.       | **                                             |
| AGL34                                            | AF058914               | At5g26575 | F21E10.14                       | 5          | 2                         | Not duplicated is sister region        |                                                |
| AGL35                                            | AF058914               | At5g26625 | F21E10.9                        | 5          | 1                         | Intrachromosomal †                     |                                                |
| AGL36                                            | AF058914               | At5g26645 | F21E10.10                       | 5          | 1                         | Intrachromosomal †                     | ¶                                              |
| AGL37                                            | AC004512               | At1g65330 | T8F5.11                         | 1          | 1                         | Intrachromosomal †                     |                                                |
| AGL38                                            | AC004512               | At1g65300 | T8F5.8                          | 1          | 1                         | Not duplicated is sister region        |                                                |
| AGL39                                            | AF007271               | At5g27130 | A_TM021B04.16/<br>T21B4.40      | 5          | 1                         | Not duplicated is sister region        |                                                |
| AGL40                                            | Z99708 /<br>AL161589   | At4g36590 | C7A10.770                       | 4          | 2                         | Not duplicated is sister region        |                                                |
| AGL41                                            | AC005168               | At2g26880 | F12C20.8                        | 2          | 2                         | Intrachromosomal †                     |                                                |
| AGL42                                            | AB016880               | At5g62165 | MTG10.20                        | 5          | 7                         | No match found in database             | ††, ‡‡                                         |
| AGL43                                            | AB010699               | At5g40220 | MSN9.13                         | 5          | 1                         | Interchromosomal †                     |                                                |
| AGL44/<br>ABNORMAL<br>NITRATE<br>RESPONSE / ANR1 | AC007210               | At2g14210 | F15N24.5                        | 2          | 8                         | Not duplicated is sister region        | 24                                             |
| AGL45                                            | AC012393               | At3g05860 | F10A16.16                       | 3          | 2                         | Not duplicated is sister region        |                                                |
| AGL46                                            | AC007184               | At2g28700 | T11P11.1                        | 2          | 1                         | Not duplicated is sister region        |                                                |
| AGL47                                            | AB009050               | At5g55690 | MDF20.13                        | 5          | 1                         | Not duplicated is sister region        |                                                |
| AGL48                                            | AC018721 /<br>AF085279 | At2g40210 | T7M7.9                          | 2          | 1                         | Interchromosomal                       |                                                |
| AGL49                                            | AC005966 /<br>AC007258 | At1g60040 | T2K10.9                         | 1          | 1                         | Not duplicated is sister region        |                                                |
| AGL50                                            | AC007258 /<br>AC005966 | At1g59810 | F23H11.13                       | 1          | 1                         | Not duplicated is sister region        |                                                |

| Gene name, symbol, and synonyms                    | Accession no.                                                 | Gene ID   | BAC no. identifier (ORF number) | Chromosome | Predicted number of exons | Type of sister paralogon duplication * | Comments and references for functional studies |
|----------------------------------------------------|---------------------------------------------------------------|-----------|---------------------------------|------------|---------------------------|----------------------------------------|------------------------------------------------|
| AGL51                                              | AF075597 / AL161494                                           | At4g02240 | T2H3.15                         | 4          | 2                         | Not duplicated is sister region        |                                                |
| AGL52                                              | AL161531                                                      | At4g11250 | F8L21.40                        | 4          | 1                         | Not duplicated is sister region        |                                                |
| AGL53                                              | AF160760                                                      | At5g27070 | F15P11.40                       | 5          | 1                         | Not duplicated is sister region        | §§                                             |
| AGL54                                              | AF160760                                                      | At5g27090 | F15P11.1                        | 5          | 1                         | Not duplicated is sister region        |                                                |
| AGL55                                              | AC018908                                                      | At1g60920 | T7P1.6                          | 1          | 1                         | Not duplicated is sister region        |                                                |
| AGL56                                              | AC018908                                                      | At1g60880 | T7P1.3                          | 1          | 1                         | Not duplicated is sister region        |                                                |
| AGL57                                              | AC016829                                                      | At3g04100 | T6K12.28                        | 3          | 1                         | Not duplicated is sister region        |                                                |
| AGL58                                              | AC010155                                                      | At1g28450 | F3M18.11                        | 1          | 1                         | Not duplicated is sister region        |                                                |
| AGL59                                              | AC010155                                                      | At1g28460 | F3M18.10                        | 1          | 1                         | Not duplicated is sister region        |                                                |
| AGL60                                              | AC016529                                                      | At1g72350 | T10D10.18                       | 1          | 1                         | Intrachromosomal                       |                                                |
| AGL61                                              | AC006585                                                      | At2g24840 | F27C12.24                       | 2          | 1                         | Not duplicated is sister region        |                                                |
| AGL62                                              | AB011483                                                      | At5g60440 | MUF9.24                         | 5          | 2                         | Not duplicated is sister region        |                                                |
| AGL63                                              | AC004793                                                      | At1g31140 | F28K20.7                        | 1          | 5                         | Not duplicated is sister region        |                                                |
| AGL64                                              |                                                               |           |                                 |            |                           | Not used in this study                 | ¶¶                                             |
| AGL65                                              | AC011809                                                      | At1g18750 | F6A14.14                        | 1          | 7                         | Not duplicated is sister region        |                                                |
| AGL66                                              | AC009243                                                      | At1g77980 | F28K19.20                       | 1          | 9                         | Intrachromosomal                       |                                                |
| AGL67                                              | AC009243                                                      | At1g77950 | F28K19.16                       | 1          | 5                         | Not duplicated is sister region        |                                                |
| AGL68/<br>FLOWERING C<br>LOCUS1 / FCL1 /<br>MAF5-I | AB02663<br>(partially)<br>AB013395<br>(partially)<br>AF214485 | At5g65080 | F15O5.4                         | 5          | 6                         | Not duplicated is sister region        | 21,                                            |

| Gene name, symbol, and synonyms          | Accession no.         | Gene ID            | BAC no. identifier (ORF number) | Chromosome | Predicted number of exons | Type of sister paralogon duplication * | Comments and references for functional studies |
|------------------------------------------|-----------------------|--------------------|---------------------------------|------------|---------------------------|----------------------------------------|------------------------------------------------|
| AGL69 / FLOWERING C LOCUS 2 / FCL2 /MAF4 | AB026633              | At5g65070          | F15O5.3                         | 5          | 8                         | Intrachromosomal                       | 21                                             |
| AGL70 / MAF3-I                           | AB026633              | At5g65060          | F15O5.2<br>F15O5(N3)            | 5          | 7                         | Not duplicated is sister region        | 21, ***                                        |
| AGL71                                    | AB025623              | At5g51870          | MJM18.2                         | 5          | 7                         | Not duplicated is sister region        |                                                |
| AGL72                                    | AB010074/<br>AB025623 | At5g51860          | MIO24.20                        | 5          | 7                         | Not duplicated is sister region        | † † †                                          |
| AGL73                                    | AB005231              | At5g38620          | MBB18.17                        | 5          | 1                         | Intrachromosomal †                     |                                                |
| AGL74                                    |                       |                    |                                 |            |                           | Not used in this study                 | ¶¶                                             |
| AGL75                                    | AB010072              | At5g41200          | MEE6.27                         | 5          | 1                         | Intrachromosomal †                     |                                                |
| AGL76                                    | AB010699              | At5g40120          | MSN9.2; MUD12.4                 | 5          | 1                         | Not duplicated is sister region        |                                                |
| AGL77                                    | AB011478              | At5g38740          | MKD10.6                         | 5          | 1                         | Not duplicated is sister region        |                                                |
| AGL78                                    | AB011479              | At5g65330          | MNA5.6                          | 5          | 1                         | Not duplicated is sister region        |                                                |
| AGL79                                    | AP001314              | At3g3026/At3g30270 | T6J22.1                         | 3          | 8                         | Not duplicated is sister region        | ‡ ‡ ‡                                          |
| AGL80                                    | AB015468              | At5g48670          | K15N18.16                       | 5          | 1                         | Interchromosomal †                     |                                                |
| AGL81                                    | AB016876              | At5g39750          | MKM21.6                         | 5          | 1                         | Interchromosomal †                     |                                                |
| AGL82                                    | AB016885              | At5g58890          | K19M22.9                        | 5          | 1                         | Not duplicated is sister region        |                                                |
| AGL83                                    | AB023033              | At5g49490          | K6M13.3                         | 5          | 1                         | Not duplicated is sister region        |                                                |
| AGL84                                    | AB023034              | At5g49420          | K7J8.9                          | 5          | 1                         | Intrachromosomal †                     |                                                |
| AGL85                                    | AC005388              | At1g54760          | T22H22.17                       | 1          | 1                         | Not duplicated is sister region        |                                                |
| AGL86                                    | AC074360.1            | At1g31630          | F27M3_17                        | 1          | 1                         | Not duplicated is sister region        |                                                |
| AGL87                                    | AC006551              | At1g22590          | F12K8.7                         | 1          | 3                         | Not duplicated is sister region        |                                                |
| AGL88                                    | AC007045              | At2g11990          | F23M2.15                        | 2          | 1                         | No match                               | §§§                                            |
| AGL89                                    | AC007478              | At5g27580          | F15A18.40                       | 5          | 1                         | Intrachromosomal †                     |                                                |
| AGL90                                    | AC007627              | At5g27960          | F15F15.30                       | 5          | 1                         | Not duplicated is sister region        | ¶¶¶                                            |

| Gene name, symbol, and synonyms | Accession no.        | Gene ID   | BAC no. identifier (ORF number) | Chromosome | Predicted number of exons          | Type of sister paralogon duplication * | Comments and references for functional studies |
|---------------------------------|----------------------|-----------|---------------------------------|------------|------------------------------------|----------------------------------------|------------------------------------------------|
| AGL91                           | AC036106             | At3g66656 | T8E24.5                         | 3          | 1                                  | Interchromosomal †                     |                                                |
| AGL92                           | AC074360.2           | At1g31640 | F27M3_16                        | 1          | 2                                  | Intrachromosomal †                     |                                                |
| AGL93                           |                      | At5g26950 | F2P16.17                        | 5          | 1                                  | Intrachromosomal †                     |                                                |
| AGL94                           | NM_105623 / AC073178 | At1g69540 | F10D13_25                       | 1          | 8                                  | Not duplicated is sister region        |                                                |
| AGL95                           |                      |           |                                 |            |                                    | Not used in this study                 | ¶¶                                             |
| AGL96                           | AP002543             | At5g06500 | F15M7.3 (also MHF15.29)         | 5          | 1                                  | Not duplicated is sister region        |                                                |
| AGL97                           |                      |           |                                 |            |                                    | Not used in this study                 | ¶¶                                             |
| AGL98                           |                      | At5g39810 | MKM21.13                        | 5          | 2                                  | Not duplicated is sister region        | ¶¶                                             |
| AGL99                           | AL162875             | At5g04640 | T32M21_240 T1E3.5               | 5          | 1                                  | Not duplicated is sister region        |                                                |
| AGL100                          | AC026479             | At1g17310 | T13M22.2                        | 1          | 1                                  | Intrachromosomal                       |                                                |
| AGL101                          | AF160760             | At5g27050 | F15P11.2                        | 5          | 1 (varies in different accessions) | Not duplicated is sister region        | ****                                           |
| AGL102                          | AC012463             | At1g47760 | T2E6.17                         | 1          | 2                                  | Not duplicated is sister region        |                                                |
| AGL103                          | AB026654             | At3g18650 | MVE11.1                         | 3          | 1                                  | Interchromosomal †                     |                                                |
| AGL104                          | AC069252             | At1g22130 | F2E2.20                         | 1          | 10                                 | Intrachromosomal                       |                                                |
| AGL105                          | AP000607             | At5g37420 | T25O11.7                        | 5          | 2                                  | Not duplicated is sister region        |                                                |

Consecutive AGL names for previously unnamed genes were assigned following agreement with Lucia Colombo and collaborators (personal communication).

\*From the paralogons in the *A. thaliana* Database (<http://wolfe.gen.tcd.ie/athal/dup>).

†Paralogon contains fewer than seven genes and therefore could be spurious.

‡Reported as AGL15 in some GenBank entries.

§The MAF1-I splicing form (21) was used for this study.

¶Sequence At5g26650 (= AGL36) has been wrongly identified with AGL29.

||The MAF2-I splicing form (21) was used for this study.

\*\*Reported as having eight exons in ref. 23.

††T. Nawy, J. E. Malamy, S. Thongrod, J. Jung, and P. N. Benfey,  
[www.arabidopsis2002.com/abstractspublic/abstract\\_expediente.asp?cdabstract=1147](http://www.arabidopsis2002.com/abstractspublic/abstract_expediente.asp?cdabstract=1147).

‡‡There is another MTG10.20 that is not a MADS protein.

§§This entry appears to have two MADS-box genes within the same ORF; we have called these AGL53 and AGL101, the former being identical to ORF F15P11.40 (see AGL101).

¶¶Personal communication by Lucia Colombo and Lucie Parenicová (not included in this study).

|||The MAF5-I splicing form (21) was used for this study

\*\*\*The MAF3-I splicing form (21) was used for this study.

†††Also called MJM18.1 (but there is another MJM18.1 that is not a MADS-box gene).

‡‡‡In some reports it is wrongly identified as AGL8.

§§§Reported as a pseudogene.

¶¶¶Reported as synonymous with AGL29 (it is on a different chromosome).

||||Almost identical to F15P11.40 and to half of AGL53.

\*\*\*\*Reported as a separate gene but could be part of AGL53 because AGL53 looks like two MADS proteins in the same ORF.

1. Yanofsky, M. F., Ma, H., Bowman, J. L., Drews, G. N., Feldman, K. A. & Meyerowitz, E. M. (1990) *Nature* **346**, 35–39.
2. Jack, T., Brockmann, L. L. & Meyerowitz, E. M. (1992) *Cell* **68**, 683–697.
3. Goto, K. & Meyerowitz, E. M. (1994) *Genes Dev.* **8**, 1548–1560.
4. Ma, H., Yanofsky, M. F. & Meyerowitz, E. M. (1991) *Genes Dev.* **5**, 484–495.
5. Pelaz, S., Ditta, G. S., Bauman, E., Wisman, E. & Yanofsky, M. F. (2000) *Nature* **405**, 200–203.
6. Liljegren, S. J., Ditta, G. S., Eshed, Y., Savidge, B., Bowman, J. L. & Yanofsky, M. F. (2000) *Nature* **404**, 766–770.
7. Mandel, M. A., Gustafson-Brown, C., Savidge, B. & Yanofsky, M. F. (1992) *Nature* **360**, 273–277.
8. Gu, Q., Ferrandiz, C., Yanofsky, M. F., Bowman, J. L. & Martienssen, R. (1998) *Development (Cambridge, U.K.)* **125**, 1509–1517.

9. Kempin, S. A., Savidge, B. & Yanofsky, M. F. (1995) *Science* **267**, 522–525.
10. Rounsley, S. D., Ditta, G. S. & Yanofsky, M. F. (1995) *Plant Cell* **7**, 1259–1269.
11. Burgeff, C., Liljegren, S. J., Tapia-López, R., Yanofsky, M. F. & Alvarez-Buylla, E. R. (2002) *Planta* **214**, 365–372.
12. Alvarez-Buylla, E. R., Liljegren, S. J., Pelaz, S., Gold, S. E., Burgeff, C., Ditta, S. G., Vergara-Silva, F. & Yanofsky, M. F. (2000) *Plant J.* **24**, 457–466.
13. Onouchi, H., Igeno, M. I., Perilleux, C., Graves, K. & Coupland, G. (2000) *Plant Cell* **12**, 885–900.
14. Samach, A., Onouchi, H., Gold, S. E., Ditta, G. S., Schwarz-Sommer, Z., Yanofsky, M. F. & Coupland, G. (2000) *Science* **288**, 1613–1616.
15. Hartmann, U., Hohmann, S., Nettesheim, K., Wisman, E., Saedler, H. & Huijser, P. (2000) *Plant J.* **21**, 351–360.
16. Michaels, S. D., Ditta, G., Gustafson-Brown, C., Pelaz, S., Yanofsky, M. & Amasino, R. M. (2003) *Plant J.* **33**, 867–874.
17. Yu, H., Xu, Y., Tan, E. L. & Kumar, P. P. (2002) *Proc. Natl. Acad. Sci. USA* **99**, 16336–16341.
18. Sheldon, C. C., Burn, J. E., Perez, P. P., Metzger, J., Edwards, J. A., Peacock, W. J. & Dennis, E. S. (1999) *Plant Cell* **11**, 445–458.
19. Michaels, S. D. & Amasino, R. H. (2001) *Plant Cell* **13**, 935–941.
20. Scortecci, K. C., Michaels, S. D. & Amasino, R. D. (2001) *Plant J.* **26**, 229–236.
21. Ratcliffe, O. J., Kumimoto, R. W., Wong, B. J. & Riechmann, J. L. (2003) *Plant Cell* **15**, 1159–1169.
22. Nesi, N., Debaujon, I., Jond, C., Stewart, A. J., Jenkins, G., Caboche, M. & Lepinier, L. (2002) *Plant Cell* **14**, 2463–2479.
23. De Bodt, S., Raes, J., Florquin, K., Rombauts, S., Rouze, P., Theissen, G. & Van De Peer, Y. (2003) *J. Mol. Evol.* **56**, 573–586.
24. Zhang, H. & Forde, B. G. (1998) *Science* **279**, 407–409.
