# Supplementary material
Source: PubMed Central journal article supplement (PMC263827)
Supplement: pnas_100_23_13407__3.pdf [file pnas_100_23_13407__3.pdf]

**Table 4. Alignment of *Arabidopsis thaliana* type I MADS domain proteins**

|        | ← MADS domain |            |            |            |              |            |
|--------|---------------|------------|------------|------------|--------------|------------|
|        | 5             | 15         | 25         | 35         | 45           | 55         |
| AGL43  | -----         | -----      | -----      | -----      | ---MTMRS-    | -----SLPS  |
| AGL75  | -----         | -----      | -----      | -----      | ---MTMRS-    | -----SSPS  |
| AGL76  | -----         | -----      | -----      | -----      | ---MTMR-     | -----SLPF  |
| AGL81  | -----         | -----      | -----      | -----      | ---MAIRSL    | PSSSRCSSSS |
| AGL98  | -----         | -----      | -----      | -----      | ---MAIRSL    | PSSSGCSNSS |
| AGL77  | -----         | -----      | -----      | -----      | ---MTTIRSS   | PSSSRCSNSS |
| AGL78  | -----         | -----      | -----      | -----      | ---MK--      | -----QASS  |
| AGL52  | -----         | -----      | -----      | -----      | ---MK--      | -----QASS  |
| AGL51  | -----         | -----      | -----      | -----      | ---MK--      | -----QSSF  |
| AGL103 | -----         | -----      | -----      | -----      | ---MASSSSSL  | SFSTSKKNKT |
| AGL93  | -----         | -----      | ---MDSS    | MSTKKKTKLS | VRNQTCFK--   | -----KSSL  |
| AGL53  | -----         | -----      | -----      | -----      | ---NQTCFK--  | -----KSSL  |
| AGL54  | -----         | -----      | -----      | -----      | ---NQTCFK--  | -----KSSL  |
| AGL89  | -----         | -----      | ---MDSS    | MSTKKKTKLS | VRNQTCFK--   | -----KSSL  |
| AGL26  | -----         | -----      | -----      | -----      | -----        | -----      |
| AGL101 | -----         | -----      | -----      | -----      | -----        | -----      |
| AGL50  | -----         | -----      | -----      | -----      | ---APRQ--    | -----KKPN  |
| AGL49  | -----         | -----      | -----      | -----      | ---APRQ--    | -----KKPN  |
| AGL36  | -----         | -----      | -----      | -----      | ---MGMKK--   | -----VKLS  |
| AGL90  | -----         | -----      | -----      | -----      | ---MGMKK--   | -----VKLS  |
| AGL34  | -----         | -----      | -----      | -----      | ---MGMKK--   | -----VKLS  |
| AGL37  | -----         | -----      | -----      | -----      | ---MRGK--    | -----MKLS  |
| AGL38  | -----         | -----      | -----      | -----      | -----        | -----MKLS  |
| AGL86  | -----         | -----      | -----      | -----      | ---MRS--     | -----KIKLS |
| AGL92  | -----         | -----      | -----      | -----      | ---MRT--     | -----KTKLV |
| AGL35  | -----         | -----      | -----      | -----      | -----        | -----MT    |
| AGL80  | -----         | -----      | -----      | -----      | ---MTRK--    | -----KVKLA |
| AGL46  | -----         | -----      | -----      | -----      | ---MARK--    | -----KLNLT |
| AGL45  | -----         | -----      | -----      | -----      | ---MTRK--    | -----KLNLS |
| AGL48  | -----         | -----      | -----      | -----      | ---MTRK--    | -----KVKLV |
| AGL41  | -----         | -----      | -----      | -----      | ---MTRK--    | -----KVKLA |
| AGL96  | -----         | -----      | -----      | -----      | ---MARK--    | -----KVRAA |
| AGL87  | -----         | -----      | -----      | -----      | ---MGRR--    | -----KVTHQ |
| AGL82  | -----         | -----      | -----      | -----      | ---MVPK--    | -----VVDLQ |
| AGL47  | -----         | -----      | -----      | -----      | ---MG--      | ---RKMVKMT |
| AGL40  | -----         | -----      | -----      | -----      | ---MVRSTKG-- | ---RQKIEMK |
| AGL62  | -----         | -----      | -----      | -----      | ---MVKKSKG-- | ---RQKIEMV |
| AGL23  | -----         | -----      | -----      | -----      | ---MVKKTLG-- | ---RRKVEIV |
| AGL28  | -----         | -----      | -----      | -----      | ---MARKNLG-- | ---RRKIELV |
| AGL61  | -----         | -----      | -----      | -----      | ---IG--      | ---RQKIPMV |
| AGL91  | -----         | -----      | -----      | -----      | ---MG--      | ---RRKIKME |
| AGL29  | -----         | -----      | -----      | -----      | ---MG--      | ---RRKIKME |
| AGL102 | -----         | -----      | -----      | -----      | ---MG--      | ---RRKIEIK |
| AGL58  | -----         | -----      | -----      | -----      | ---KG--      | ---KQKINIK |
| AGL59  | -----         | -----      | -----      | -----      | ---KG--      | ---KQKINIK |
| AGL85  | -----         | -----      | -----      | -----      | ---MKTDW--   | ---SHYLSVE |
| AGL88  | -----         | -----      | -----      | -----      | -----        | -----      |
| AGL57  | -----         | -----      | -----      | -----      | ---KGRKTKG-- | ---KQKIEMK |
| AGL84  | -----         | -----      | -----      | -----      | ---MVKKGGT-- | ---KRKIAIE |
| AGL73  | -----         | -----      | -----      | -----      | ---GT--      | ---KRKIAIE |
| AGL83  | ---MRFVPPYL   | YEIERLWLSL | VNYLSRPNK  | NRRCGEIDKI | RMVKKGGT--   | ---KRKIAIE |
| AGL56  | -----         | -----      | -----      | -----      | ---MGGK--    | ---KTKIEIK |
| AGL55  | -----         | -----      | -----      | -----      | ---GT--      | ---KRKIEMK |
| AGL99  | -----         | -----      | -----      | -----      | ---MGGV--    | ---KRKISIE |
| AGL39  | -----         | -----      | -----      | -----      | ---GT--      | ---KRKIEIK |
| AGL60  | ---MEDGEA     | STITFLPTTE | PKPLQNPPLL | AK-PKKETKQ | KKPKTTKG--   | ---RQKIEIK |
| AGL100 | MKDLFMEGER    | ETSSMTCLTP | KDSVQSPNML | VRQPKKETT  | QTPKTTRG--   | ---RQKIEIK |
| AGL33  | -----         | -----      | -----      | MKRTIKNKNK | QIVKENMG--   | ---RKLLKLL |

|       | MADS domain |            |            |           |            |          |
|-------|-------------|------------|------------|-----------|------------|----------|
|       | 65          | 75         | 85         | 95        | 105        | 115      |
| AGL43 | SSSAYS----  | -LASTSLSNR | LETIFKKASE | LCTLCDIEA | CVIYYGPDGE | -----LKT |
| AGL75 | SSSSYS----  | -LAFSLSNR  | LETIFKKASE | LCTLCDIEA | CVIYYGPDGE | -----LKT |
| AGL76 | SSSSYS----  | -LASTSLSNR | LETIFKKASE | LCTLCDIEA | CVIYYGPDGE | -----LKT |
| AGL81 | SSSSYS----  | -LASTSLSNR | LETIFKKASE | LCTLCDIEA | CVIYYGPDGE | -----LKT |
| AGL98 | SSSSYS----  | -LASTSLSNR | LETIFRKASE | LCTLCDIEA | CVIYYGPDGE | -----LKT |
| AGL77 | SSSSYS----  | -LASTSLSNR | LETIFKKASE | LCTLCDIEA | CVIYYGPDGE | -----LKT |
| AGL78 | SSSS-----   | -RNSTSLTNR | LKTIFKKAEE | LSILCAIEV | CVIYYGPDGE | -----LRT |

|        |            |             |             |            |             |             |
|--------|------------|-------------|-------------|------------|-------------|-------------|
| AGL52  | SSS-----   | -CNPTSLTNR  | LKTIFKKAEE  | LSILC-AIDV | CVIYYGPDGD  | -----LRT    |
| AGL51  | SSSSS----  | -RNSTSLTNR  | LKTIFKKAEE  | LSILC-AIDV | CVIYYGPDGE  | -----LRT    |
| AGL103 | FFKKPNSAFS | SSRATSLIKR  | QQTVFKKAKE  | LSILC-DIDV | CVICYGSNGE  | -----LKT    |
| AGL93  | SSSSTA---- | -KKTNTLSMR  | EQTMFKKALE  | LSTLC-NIDV | CVIYYGRDGG  | -----LIKT   |
| AGL53  | SSSSTA---- | -KKTNTLSMR  | EQTMFKKALE  | LSTLC-NIDV | CVIYYGRDGG  | -----LIKT   |
| AGL54  | SSS-NA---- | -KKTNTLSMR  | EQTMFKKALE  | LSTLC-DIEV | CVIYYGRDGG  | -----LIKT   |
| AGL89  | SSSSTA---- | -KKTNTLSMR  | EETMFKKALE  | LSTLC-DIEV | CVIYYGRDGE  | -----LIKT   |
| AGL26  | -----      | -----MR     | EDTMFKKALE  | LSTLC-DIEV | CVILYSRDGE  | -----LIKT   |
| AGL101 | -----      | -----       | ---MFKKALE  | LSTLC-NIEV | CVIYYGRDGE  | -----LFKT   |
| AGL50  | KSDDDD-DLR | RKKQSFFKQR  | FPGFKKKASE  | LSVLC-GNSV | GFICYGPDSD  | -----DLHV   |
| AGL49  | KSDDDDGDLH | RKKQSFFKQR  | FPGFKKKASE  | LSVLC-GNSV | GFICYGPDN   | -----DLHV   |
| AGL36  | LIANER---- | -SRKTSFIKR  | KDGFIFKKLHE | LSTLC-GVQA | CALIYSPFIP  | -----VPES   |
| AGL90  | LIANER---- | -SRKTSFMKR  | KNGIFKKLHE  | LSTLC-GVQA | CALIYSPFIP  | -----VPES   |
| AGL34  | LIANEI---- | -SRETSFMKR  | KNGIMKKLYE  | LSTLC-GVQA | CTLIYSPFIP  | -----VPE    |
| AGL37  | FIENDS---- | -VRKTTFTKR  | KKGMLKKFNE  | LVTLC-GVDA | CAVIRSPYNS  | -----IQEP   |
| AGL38  | LIENSV---- | -SRKTTFTKR  | KKGMTKKLTE  | LVTLC-GVEA | CAVVYSPFNS  | -----IPEA   |
| AGL86  | LIANKT---- | -SRRTTFRKR  | KGGITNKLHE  | LTTLC-GVKA | CAVISSPYEN  | -----PVV    |
| AGL92  | LIPDRH---- | -FRRTTFRKR  | NAGIRKKLHE  | LTTLC-DIKA | CAVIYSPFEN  | -----PTV    |
| AGL35  | FIENET---- | -ARKSTFKKR  | KKGLLKKQAE  | LGILC-GVPI | FAVVNSPYEL  | -----NPEV   |
| AGL80  | YISNDS---- | -SRKATFKKR  | KKGLMKKVHE  | LSTLC-GITA | CAIISPYDT   | -----NPEV   |
| AGL46  | YIFNDR---- | -MRKRSFKQR  | REGFLKKLND  | LKVLC-DVNA | CAVVYNPFNS  | -----NPDV   |
| AGL45  | YITNES---- | -MRKATFNKR  | KKGLVKKLHE  | LSVLC-GIEA | CAVIYSPFNS  | -----NPEV   |
| AGL48  | WIENDK---- | -SRATSLQKM  | RVGLLKKVKE  | LTILC-AVRA | IVIIFSPDKV  | -----GPLV   |
| AGL41  | WIENDN---- | -TRAI SLRKR | RVGLVKKVRE  | LSILC-DIKA | CTIVFSPNEA  | -----ELMV   |
| AGL96  | WIRDDR---- | -MRRASLKRR  | LTGLIKKVNE  | LSILC-DMRA | SVVVFNREEE  | -----QLTA   |
| AGL87  | LISDNA---- | -TRRVTFRRK  | KDGLLKKIYE  | LTVLC-GLPA | CAIYSEYKD   | -----GPEL   |
| AGL82  | RIANDK---- | -TRITTYKQR  | KASLYKKQAE  | FSTLC-GVET | CLIVYGPTKA  | TDVVI SEPEI |
| AGL47  | RITNEK---- | -TRITTYKQR  | KACLYKKASE  | FSTLC-GVDT | CVIVYGPSRA  | GDEMMEPEL   |
| AGL40  | KMENES---- | -NLQVTFSKR  | RFGLFKKASE  | LCTLS-GAEI | LLIVFSPGGK  | -----VFS    |
| AGL62  | KMKNES---- | -NLQVTFSKR  | RSGLFKKASE  | LCTLC-GAEV | AIVVFSPPGRK | -----VFS    |
| AGL23  | KMTKES---- | -NLQVTFSKR  | KAGLFKKASE  | FCTLC-DAKI | AMIVFSPAGK  | -----VFS    |
| AGL28  | KMTNES---- | -NLQVTFSKR  | RSGLFKKASE  | LCTLC-DAEI | AIVVFSPPSGK | -----AYS    |
| AGL61  | KIKKES---- | -HRQVTFSKR  | RAGLFKKASE  | LCTLC-GAEI | GIVVFSPAKK  | -----PFS    |
| AGL91  | KVQDTN---- | -TKQVTFSKR  | RLGLFKKASE  | LATLC-NAEV | GIVVFSPPGK  | -----PYS    |
| AGL29  | MVQDMN---- | -TRQVTFSKR  | RTGLFKKASE  | LATLC-NAEL | GIVVFSPPGK  | -----PFS    |
| AGL102 | FIEDSI---- | -ERKATFSRR  | RNGIFKKADE  | LAKLC-NVEI | AVLVI SPTNI | -----PYT    |
| AGL58  | KIEKDE---- | -DRSVTFSKR  | LNAIYTMIE   | LSILC-GVEV | AFIGYSCSGK  | -----PYT    |
| AGL59  | KIEKDE---- | -GRSVTFSKR  | LNGIYTKISE  | LSILC-GVEV | AFIGYSCSGK  | -----PYT    |
| AGL85  | MES-----   | -----TISN-  | -----E      | LSILC-GAEV | AFLGYSCSGK  | -----PYT    |
| AGL88  | -----      | -----       | -----MNE    | LVAMC-DVEV | AFLIFSOPKK  | -----PYT    |
| AGL57  | KVENYG---- | -DRMITFSKR  | KTGIFKKMNE  | LVAMC-DVEV | AFLIFSOPKK  | -----PYT    |
| AGL84  | TIQKRD---- | -SLRVTCTKR  | REGLYSKASQ  | LCLLS-DAQI | AILATPPSSE  | S---NVSFYS  |
| AGL73  | TIQKRD---- | -SLRVTCTKR  | RKGLYSKASQ  | LCLLS-DAQI | AILATPPSSE  | S---DVSFYS  |
| AGL83  | TIQKSD---- | -YLRVTCTKR  | REGLFKSKASQ | LCLLS-DAQI | AILATPPTSE  | S---NISFYS  |
| AGL56  | KIINKP---- | -AKTVAFTKR  | REGLFKSKASQ | LCLLSPATQI | AILAAPMTSK  | S---HASFYS  |
| AGL55  | RIEDKN---- | -VRAVAFTRK  | KSGLFHKASE  | LCLLSPGTQI | AILATPLSSH  | S---HASFYS  |
| AGL99  | LIEKKD---- | -SRAVAFSKR  | SRGLYSKASD  | LCLLS-DAQI | AI IATPVSSK | S---NVSFYS  |
| AGL39  | KRETKE---- | -QRAVTCFSKR | RQTVFSKAAD  | LCLIS-GANI | AVFVTSPPSDS | S---DVSFYS  |
| AGL60  | EIMLET---- | -RRQVTFSKR  | RSGLFKKAAE  | LSVLC-GAQI | GIITFSRCDR  | -----IYS    |
| AGL100 | KIEEET---- | -KRQVTFSKR  | RRGLFKKSAE  | LSVLT-GAKI | AVITFSKCDR  | -----IYR    |
| AGL33  | RIESLK---- | -ERSKFSKR   | KKGLFKKAAE  | VALLC-DSDI | MLIVVSPTEK  | -----PTV    |

**MADS domain** 

|        |             |               |             |             |             |             |
|--------|-------------|---------------|-------------|-------------|-------------|-------------|
|        | ..... ..... | ..... .....   | ..... ..... | ..... ..... | ..... ..... | ..... ..... |
|        | 125         | 135           | 145         | 155         | 165         | 175         |
| AGL43  | WPPEE----   | E KVRDIALRYS  | Q-LNEALRRK  | KSVNLHGFLN  | KKKK-----N  | KGLKNTDK-K  |
| AGL75  | WPKEK----   | E KVRDIALRYS  | L-LNEALRRK  | KSVNLHGFLN  | KKK-----N   | KGLKNPNK-K  |
| AGL76  | WPKEK----   | E KVRDIALRYS  | Q-LNEALRSK  | KSVNLHGFLN  | KKKKK--KK   | KGLKNPNN-K  |
| AGL81  | WPPEE----   | E KVEDIALRYS  | Q-LNEALRRK  | KSVTLYDFLN  | KKKDKTNLEK  | KAKITDND-D  |
| AGL98  | WPPEE----   | E KVEDIALRYS  | Q-LNEALRRK  | KSVTLYDFLN  | KKKKNTNLEK  | KAKIKDND-L  |
| AGL77  | WPKER----   | E KVRDIALRFN  | Q-LNEALRHK  | KSVNLHGFLN  | KKK-----KN  | KGLKNPNK-K  |
| AGL78  | WPKER----   | E TVKDMALRYK  | -----EARKRK | KSRNLHEFLE  | KE-----     | ---KDKD--K  |
| AGL52  | WPKDR----   | E TVKNMALRYK  | -----EDRKRK | KCLNLHEFLE  | KEK-----    | --VKDKDKYK  |
| AGL51  | WPKER----   | N TVKDMASRYK  | -----EATKRK | K-----      | -----       | -----       |
| AGL103 | WPEER----   | E KVKA IARRYG | E-LSETKRRK  | GSVDLHEFLE  | KMNKD-----  | DPEKEEKKKI  |
| AGL93  | WPPDQ----   | S KVRDMAERFS  | R-LHERERCK  | KRTNLSLFLR  | KK-----     | -----       |
| AGL53  | WPEDQ----   | S KVRDMAERFS  | R-LHERERCK  | KRTNLSLFLR  | KK-----     | -----       |
| AGL54  | WPEDQ----   | S KVRDMAERFS  | R-LHERERCK  | KRTNLSLFLR  | KQ-----     | -----       |
| AGL89  | WPEDQ----   | S KVRDMAERFS  | K-LHERERRK  | KRTNLSLFLR  | KK-----     | -----       |
| AGL26  | WPEDQ----   | S KVRDMAERFS  | K-LHERERRK  | KRTNLSLFLR  | KK-----     | -----       |
| AGL101 | WPEDE----   | S KVRDMAERFT  | K-LNERERRK  | KRTNLSLFLR  | KK-----     | -----       |
| AGL50  | WPQSDHNPQ   | ALHEIVAKFN    | A-LSDERRKN  | HACDLNDFP-  | -----       | -----       |

|        |            |             |            |            |             |          |
|--------|------------|-------------|------------|------------|-------------|----------|
| AGL49  | WPQSQDHPQ  | ALHEIVAKFN  | A-LSDERRKN | HACDLNDFP- | -----       | -----    |
| AGL36  | WPSR-----E | GAKKVASRFL  | E-MPPTARTK | KMMDQETYLM | ER-----     | -----    |
| AGL90  | WPSR-----E | GAKKVASRFL  | E-MPRTARTR | KMMDQETHLM | ER-----     | -----    |
| AGL34  | -----      | -----FL     | E-MSPTARTR | KMMNQETYLM | ER-----     | -----    |
| AGL37  | WPSR-----E | GVEEVMSKFM  | E-FSVLDRTK | KMVDQETFLR | QR-----     | -----    |
| AGL38  | WPSR-----E | GVEDVVSXFM  | E-LSVLDRTK | KMVDQETFLR | QR-----     | -----    |
| AGL86  | WPST-----E | GVQEAUSMFM  | E-RPATEQSK | LMMSHETYLQ | DK-----     | -----    |
| AGL92  | WPST-----E | GVQEVISEFM  | E-KPATERSK | TMMSHETFLR | DQ-----     | -----    |
| AGL35  | WPSR-----E | AANQVVSQWK  | T-MSVMDKTK | KMVNQETFLQ | QR-----     | -----    |
| AGL80  | WPSN-----S | GVQRVVSFR   | T-LPEMDQHK | KMVDQEGFLK | QR-----     | -----    |
| AGL46  | WPSK-----S | EVNNIIKKFE  | M-LPETQKKV | KSVNHEEFLN | -----       | -----    |
| AGL45  | WPSN-----S | EVKNVMENFE  | M-LTKLEQEK | KMVSHEGFIR | QN-----     | -----    |
| AGL48  | WPSP-----Q | ATHGLLDEFF  | A-LPKSVQKK | KESNVESYLK | EK-----     | -----    |
| AGL41  | WPS-----   | -----VE     | RLMDIELFLN | EK-----    | -----       | -----    |
| AGL96  | WPSP-----E | AANSLIDNFY  | S-LTDHERTM | KAVDPES--- | -----       | -----    |
| AGL87  | WPNL-----N | EVRSILNRLS  | E-LPVEKQTK | YMMDQKDLMN | KM-----     | -----    |
| AGL82  | WPKDE---T  | KVRAIRKYK   | DTVSTSCRKE | TNVETFVNDV | GK-----     | -----    |
| AGL47  | WPKDG---S  | KVREILTKYR  | DTASSSCTKT | YTVQECLEKN | -----       | -----    |
| AGL40  | FGHP-----  | SVQELIHRFS  | N-PNHNSAIV | HHQNNN---- | -----       | -----    |
| AGL62  | FGHP-----  | NVDSVIDRFI  | N---NNPLP  | PHQHNN---- | -----       | -----    |
| AGL23  | FGHP-----  | NVDVLLDHRF  | G---CVVG   | HNN-----   | -----       | -----    |
| AGL28  | FGHP-----  | NVNKLLDHSL  | G---RVIR   | HNN-----   | -----       | -----    |
| AGL61  | FGHP-----  | SVESVLDRVV  | S-RN-NMSLA | QSQ-----   | -----       | -----    |
| AGL91  | FGKP-----  | NFDVIAERFK  | N-EFEEEEEG | DSCET----- | -----       | -----    |
| AGL29  | YGKP-----  | NLDSVAERFM  | R-EYDSDSDG | D-----     | -----       | -----    |
| AGL102 | YGYP-----  | CFNDVVERIQ  | N---P----- | -----      | -----       | -----    |
| AGL58  | FGSP-----  | SFQAVVERFL  | N-G--EASSS | SSSSLQ---- | -----       | -----    |
| AGL59  | FGSP-----  | SFQAVAERFL  | N-G--DASSS | SSS-----   | -----       | -----    |
| AGL85  | FGSP-----  | SFQAVAERFL  | N-R--EASSS | LQR-----   | -----       | -----    |
| AGL88  | FAHP-----  | SMKEVADRLK  | N---PSRQEP | LEKDN----- | -----       | -----    |
| AGL57  | FAHP-----  | SMKKVADRLK  | N---PSRQEP | LERDD----- | -----       | -----    |
| AGL84  | FGHS-----  | SVDAVVSAFL  | S---GQR--P | VPKDNKETRE | DV-----     | -----    |
| AGL73  | FGHS-----  | SVDAVVSAFL  | S---GKRQVS | APKDNKETRE | DV-----     | -----    |
| AGL83  | FGHS-----  | SVDAVVSSFL  | S---GQRQVP | LQEDTKEMRE | DV-----     | -----    |
| AGL56  | FGHS-----  | SVDNVVSSLL  | Y---DHPPLT | ANQDN----- | -----       | -----    |
| AGL55  | FGHS-----  | SVDHVSSLL   | H-N-QHPSLP | TNQDN----- | -----       | -----    |
| AGL99  | FGHS-----  | SVDNVVA AFL | T-N---QRP  | RE-----    | -----       | -----    |
| AGL39  | FSGYS----- | SAYEADCYL   | NRKPPPKIVN | PA-----    | -----       | -----    |
| AGL60  | FGN-----   | -VNSLIDKYL  | R-KAPVMLRS | HPGGN----- | -----       | -----    |
| AGL100 | FGH-----   | -VDALIDKYL  | R-KSPVKLEG | YSGDN----- | -----       | -----    |
| AGL33  | FNTRSRSFHT | I-----      | -----LER   | FCMLSLQERE | ERCDSLZYFYI | IIT----- |

|        |            |             |             |            |            |            |
|--------|------------|-------------|-------------|------------|------------|------------|
|        | .... ....  | .... ....   | .... ....   | .... ....  | .... ....  | .... ....  |
|        | 185        | 195         | 205         | 215        | 225        | 235        |
| AGL43  | RKTSLKK-VN | VLKYPLADHY  | PPDQVSPL--  | -IQSLELHVS | KFHE-RLEFL | ESR-KQNETQ |
| AGL75  | MKTSLKN-VN | ILKYPLADHY  | PPDQVSPL--  | -IQSLELHVS | KFQE-RLRFL | ESQ-KQNQTK |
| AGL76  | RKTKLKNVN  | VLKYPLADHY  | PPDQVSPL--  | -TQSLKLHVS | KFQE-RLRFL | ESQ-KQ--TK |
| AGL81  | LKTKLKN-VN | ILKYPLADHY  | SPDQVSQVL-- | -IQSLEPHVS | KVRE-RIRFV | ESQ-KHKETK |
| AGL98  | KRL-----   | -----       | -----       | ---SLEPHVS | KVRE-RIRFV | ESQ-KHKETK |
| AGL77  | KKTSLKN-VN | VLKYPLADHY  | SPDQVSQVL-- | -TQSLELNVS | KFQE-RLRFL | ESQ-KQNETK |
| AGL78  | GKTNLKK--- | -NWYPNFDHY  | SPQQLSQL--  | -IQSLERTLS | TLQE-RLRIV | EAQ-KLQNTN |
| AGL52  | GKTNVVK--N | PNWYPNFDHY  | SPQQLSQL--  | -IQSLERTLS | TLQK-RLRIV | ESQ-KKQNTN |
| AGL51  | -----      | -----KR     | -----       | -----TLS   | TLQE-RLRIV | ESQ-KQONKN |
| AGL103 | KVRRVPKVKY | PVWDPFRFDNY | SVEQLMGL--  | -VQSLERNLT | RIQH-RTCAV | VEA-QGQRRV |
| AGL93  | -----      | ----ILDDTK  | LSEKVLEM--  | -EDSLESGLR | VLQD-KLLLL | QPE-KNQTEF |
| AGL53  | -----      | ----ILDDTK  | LSEKVLEM--  | -EDSLESGLR | VLQD-KLLLL | QPE-KNQTEF |
| AGL54  | -----      | ----ILHDKK  | LSEKVLEM--  | -EDSLESGLR | VLQD-KLLLL | QPE-KNQTEL |
| AGL89  | -----      | ----ILDDNK  | LSEKVLEM--  | -KDSLESGLR | VLQD-KLLLL | QPE--NQTEL |
| AGL26  | -----      | ----ILDNSK  | LSEKVLEM--  | -KDSLESGLR | VLQD-KLLLL | QPE-KNQTEL |
| AGL101 | -----      | ----ILDNDK  | LSGKVLNEM-- | -KDSLERGLR | VLQD-KLLLL | QPE--NQTKS |
| AGL50  | -----      | -----HHL    | KGLSREELR-  | -KHLHLDSQ  | LLGV-REQKI | EIL-KKTLTG |
| AGL49  | -----      | -----HHL    | KGLSREELR-  | -KHLHLDSQ  | LLGV-REQKI | EIL-KKTLTG |
| AGL36  | -----      | -----ITK    | AKEQLKNLA-  | -AENRELQVR | RFMF-DCVEG | KMS-QYHYDA |
| AGL90  | -----      | -----ITK    | AKEQLKNLA-  | -AENRELQVR | RFMF-DCVEG | KMS-QYRYDA |
| AGL34  | -----      | -----ITK    | AKEQLQNLV-  | -GANQELQYR | -----      | -----YDA   |
| AGL37  | -----      | -----IAK    | ETERLQKLR-  | -DENRNSQIR | DLMF-GCLKG | EVD-VSHLHG |
| AGL38  | -----      | -----IAK    | EKEQLQKLR-  | -DENHNSQIR | ELMF-GCLKG | ETN-VYNLDG |
| AGL86  | -----      | -----ITK    | ETKKLESRL-  | -RENRESQLR | QFMF-DCVEG | KMS-EHQYGA |
| AGL92  | -----      | -----ITK    | EQNKLESRL-  | -RENRETQLK | HFMF-DCVGG | KMS-EQQYGA |
| AGL35  | -----      | -----ITK    | ATESWKKLR-  | -KENKELEMK | NIMF-DCLSG | KTL-VSSIEK |
| AGL80  | -----      | -----IAK    | ATETLRQR-   | -KDSRELEMT | EVMF-QCLIG | NME-MFHLNI |
| AGL46  | -----      | -----LYISK  | VEKQSKKLI-  | -VENKETCLK | EVMF-KCLGG | NMG-DFVMND |

|        |       |       |      |            |            |             |             |
|--------|-------|-------|------|------------|------------|-------------|-------------|
| AGL45  | ----- | ----- | ISK  | TMESNNKMK  | -IDNAERTMK | EAMF-QLLSG  | KGE-KLNLTD  |
| AGL48  | ----- | ----- | THK  | FQEQLKSKS  | -KKNKEHVID | ELMM-QLQSG  | R-E-IADLNQ  |
| AGL41  | ----- | ----- | TNK  | VNEKLIKSC  | -KKNKEYVSN | ELMM-QLQRG  | R-R-IHDLNL  |
| AGL96  | ----- | ----- | YVQT | VIEKIEKKR  | -ADTRKVITE | FEMDELMFQV  | QNGRELADLS  |
| AGL87  | ----- | ----- | IQD  | AEKKLEK    | -----      | EKMHT       | RAMK-LGLMA  |
| AGL82  | ----- | ----- | GNEV | VTKKRVKREN | KYSSWEEKLD | KCSREQLHGI  | FCAVDSKLINE |
| AGL47  | ----- | ----- | NTK  | VEKPTIAT   | ---KYPTWDK | KLDQCSSLNDL | YAVFMAVENK  |
| AGL40  | ----- | ----- | LQ   | LVETRPDR   | ---NIQYLNN | ILTE-VLANQ  | EKE-KQKRMV  |
| AGL62  | ----- | ----- | MQ   | LRRETRNS   | ---IVQDLNN | HLTQ-VLSQL  | ETE-KKKYDE  |
| AGL23  | ----- | ----- | TN   | LDESYTKL   | ---HVQMLNK | SYTE-VKAEV  | EKE-QKNKQS  |
| AGL28  | ----- | ----- | TN   | FAESRTKL   | ---RIQMLNE | SLTE-VMAEK  | EKE-QETKQS  |
| AGL61  | ----- | ----- | GIC  | LQGS--PA   | ---ASCELNM | QLTH-ILSEV  | EEE-KKKGQA  |
| AGL91  | ----- | ----- | SG   | YSRGNRAR   | ---QEKKICK | RLNS-ITEEA  | EAE-KKHGED  |
| AGL29  | ----- | ----- | EE   | KS-GNYRP   | ---KLKRLSE | RIDL-LNQEY  | EAE-KERGEK  |
| AGL102 | ----- | ----- |      |            | -----      | SASS-KLRSL  | MKELEQIKEF  |
| AGL58  | ----- | ----- | RS   | VKNAHQQA   | ---KIQELCK | RYNR-LVEEL  | KVD-EVKVKK  |
| AGL59  | ----- | ----- | SL   | VMNAHQQA   | ---KIQELCK | KYNR-LVEEL  | KVD-EVKVKK  |
| AGL85  | ----- | ----- | S    | VMNAHQQA   | ---KIQELCK | VYNR-MVEEA  | KTE-EAKVKK  |
| AGL88  | ----- | ----- | TRP  | LVEAYKKQ   | ---RFHDLIK | KMEA-LEEEL  | AMDLEKLLKLL |
| AGL57  | ----- | ----- | TRP  | LVEAYKKR   | ---RLHDLVK | KMEA-LEEEL  | AMDLEKLLKLL |
| AGL84  | ----- | ----- | GIC  | LTRNNLGL   | ---GFWWNDE | SLAR-SENPO  | EIS-EAIDSM  |
| AGL73  | ----- | ----- | GIC  | LTRKNLGL   | ---GFWWNDE | SLVR-SENPO  | EIS-EAIGSM  |
| AGL83  | ----- | ----- | AIC  | LSRTNLGL   | ---GFWWNNE | SLNK-SENPO  | EIS-DAINSM  |
| AGL56  | ----- | ----- |      |            | ---RS--GL  | RFDV-SENVE  | ELK-EAVDAV  |
| AGL55  | ----- | ----- |      |            | ---RS--GL  | AFDR-LENVD  | ELK-EAVDAV  |
| AGL99  | ----- | ----- |      |            | ---GL--GL  | DYWWEDE     | RLSK-SEdle  |
| AGL39  | ----- | ----- |      |            | ---GS--KL  | DLYHSCDDL   | ELS-IIEDRL  |
| AGL60  | ----- | ----- | VA   | NGEEDNDG   | ---LMWVERA | VESV-PE--E  | HME-EYKNAL  |
| AGL100 | ----- | ----- | AA   | DEESRRP    | ---WWERP   | VESV-PE--E  | ELE-EYMAAL  |
| AGL33  | ----- | ----- |      |            | -----      |             |             |

|        |             |            |             |            |             |            |
|--------|-------------|------------|-------------|------------|-------------|------------|
|        | .... ....   | .... ....  | .... ....   | .... ....  | .... ....   | .... ....  |
|        | 245         | 255        | 265         | 275        | 285         | 295        |
| AGL43  | PDHHS----   | LASSSLNHQT | QSLNPSQFSL  | FMYNHGD-NT | LSQIPVS---  | -----      |
| AGL75  | PDHQS----   | LTPSSLNHYT | QSLNPSQFSL  | FMYNHGD-NT | LSQIPVS---  | -----      |
| AGL76  | PDHQS----   | LTPSSLNHQT | QSLNPRQFSL  | FMYNHGD-NT | LSQISVS---  | -----      |
| AGL81  | PDHQS----   | LASSSLNHQT | QSLNPSQFSL  | FMYNHGD-NT | LSQIPVS---  | -----      |
| AGL98  | PDHQS----   | LASSSLNNQT | QSLNPSQFSL  | FMYNHGD-NI | LSQIPVS---  | -----      |
| AGL77  | PDHQS----   | LTS--ISSLN | QSLNPSQFSL  | FMYNHGY-NT | LSQIPVS---  | -----      |
| AGL78  | LVHQS----   | LTP-SYLNQT | QHLNPSKFSL  | FMYNHGD-AT | LSQLPLS---  | -----      |
| AGL52  | LVHQS----   | LTP-SYLNQT | QHLNPSKFSL  | FMYNHGD-AT | LSQLPLS---  | -----      |
| AGL51  | LVHQS----   | LTP-SYLNQI | QHLNPSNFSP  | FMYNHGDAAT | LSQLPLS---  | -----      |
| AGL103 | QYTNNMANQEL | MMA-NTMNQL | QQHSN-QVSM  | YLWNHNGA-  | FSQIPVS---  | -----      |
| AGL93  | GQTRA----   | VSS----TTN | PLSPPPS---  | LIEDHRHQQR | TEPLMSG---  | -----      |
| AGL53  | GQTRA----   | VSS----TTN | PLSPPPS---  | LIEDHRHQQR | TEPLMSG---  | -----      |
| AGL54  | GQSCA----   | VYS----TTY | PLSSPSL---  | IEDHQHQQQW | TEPLSNT---  | -----      |
| AGL89  | GQSRA----   | VSS----TTN | PLSSP---    | EDHHHQQQW  | TEPLVTG---  | -----      |
| AGL26  | GQIPV----   | INN----GQN | HW-----     |            |             | -----      |
| AGL101 | -LTRS----   | VSS----LDY | LRTGNMKKKR  | CILSSQIKLI | VENEFCS---  | -----      |
| AGL50  | SSEKD----   | GARVS-ENSA | ISDHKLIKIEP | HLKDILSEDH | LIRVSDK---  | -----      |
| AGL49  | SSEKD----   | GARVS-ENSA | ISDHKLIKIEP | NLTDILSEDH | LIRVSDK---  | -----      |
| AGL36  | KDLQD----   | LQSCINLYLD | QLNGRIESIK  | ENGESLL-SS | VSPFPTRIGV  | DEIGDESFS  |
| AGL90  | KDLQD----   | LLSCMNLYLD | QLNGRIESIK  | ENGESLL-SS | VSPFPTRIGV  | DEIGDESFS  |
| AGL34  | KDLQD----   | LLSCINLYLD | QLNGRIEILK  | EHGDSLP--S | VSPFPTRIGV  | EETGDESSD  |
| AGL37  | RDLLD----   | LNFLNKYLN  | GVIRRVIEILK | ENGESSSSVP | PPIGVA----  | -----      |
| AGL38  | RDLQD----   | LSLYIDKYLN | GLTRRIEILI  | ENGESSSSLP |             | -----      |
| AGL86  | RDLQD----   | LSLYIDHYLN | QLNSSVMLLT  | NNGASSSSFP | PPLHT-----  | S          |
| AGL92  | RDLQD----   | LSLFTDQYLN | QLNARKKFLT  | EYGESSSSVP | PLFDVAGANP  | PVVADQAAVT |
| AGL35  | TELRD----   | FGYVIEQQLK | DVNRRIEILK  | RNNEPSSALV | --PVAAP---  | -----      |
| AGL80  | VDLND----   | LGYMIEQYLN | DVNRRIEILR  | NSGTEI-GES | SSVAVAASEG  | NIPM-----  |
| AGL46  | NDRLD----   | LCKFIDHYLR | NLYHHKNVTL  | NNPNFEIGES | SSLMDMAP--- | -----      |
| AGL45  | NRRED----   | LCKYIDQYLN | ELYHHKNKTI  | NQSHIE---- | --PGESS---  | -----      |
| AGL48  | SEMYA----   | LLSFSRDTIL | LCKRKKLAFMQ | FPPLRDP--P | VFPFIEQVEE  | FKTTTNDGFV |
| AGL41  | SEIYT----   | LLSYSRETIM | SFRKKKDFMQ  | HSPLRDP--P | VLPFVEQVEQ  | FKSTTKDAFL |
| AGL96  | PTEAD----   | KLIPYADKKL | MWLSKRMGST  | GVDALRASNV | ASGSGGN---  | -----      |
| AGL87  | DCSEE----   | LARAADVVDK | KLKAIRERIK  | AVEAGA---- | --PIIKR---  | -----      |
| AGL82  | AVTRQ----   | ERS--MFRVN | HQAMDTFPFQ  | NLMDQQFMPQ | YFHEQPQ---  | -----      |
| AGL47  | IQEAT----   | NRN-QTFPDT | SCWSNDQLGL  | CGYNRQCFEQ | YQLFPLP---  | -----      |
| AGL40  | LDLLK----   | ES---REQVG | NWYEKDV---  | KDLDMN---- | --ETN-----  | -----      |
| AGL62  | LKKIR----   | EK---TKALG | NWVEDPV---  | EELALS---- | --OLE-----  | -----      |
| AGL23  | RAQNE----   | RE---NENAE | EWSKSP---   | LELNLS---- | --QST-----  | -----      |

|        |            |            |             |             |            |            |
|--------|------------|------------|-------------|-------------|------------|------------|
| AGL28  | IVQNE----  | RE---NKDAE | KWWRNSP---  | TELNLA----  | --QST----- | -----      |
| AGL61  | MEEMR----- | KES-VRRSMI | NWWEKPV---  | EEMNMV----  | --QLQ----- | -----      |
| AGL91  | LHKWL----- | ES-----AEQ | DKFNKPI---  | EELTLE----- | --ELK----- | -----      |
| AGL29  | SQEKL----- | ES-----AGD | ERFKESI---  | ETLTLD----- | --ELN----- | -----      |
| AGL102 | QEDLR----- | KKQQRN-LEK | SNMK-ENVDL  | KLEDLV----- | -----      | -----      |
| AGL58  | AAALA----- | ET--RAVNKD | AWWKADPN--  | DVKDHE----- | --KAK----- | -----      |
| AGL59  | AAALA----- | ET--RVVNKD | VWVKVDPN--  | DVKDHE----- | --KAK----- | -----      |
| AGL85  | AAALA----- | ET--MPVDED | AWWKVDPK--  | EVEDHE----- | --EAK----- | -----      |
| AGL88  | KESRN----- | EKK----LDK | MWWNFPSEGL  | SVKELQ----- | --ERH----- | -----      |
| AGL57  | KESRN----- | EKK----LDK | MWWNFPSEGL  | SAKELQ----- | -----      | -----      |
| AGL84  | RTLLR----- | NLK-ELRADE | ALACNQAFVN  | DREDLK----- | --NNDKC--- | -----      |
| AGL73  | WTLLS----- | NLK-ELRADE | ACVN-----   | DHKDLK----- | --KNEKS--- | -----      |
| AGL83  | LTLLS----- | NLK-ELSGEE | ALVN-----   | DHKDLK----- | --KNERS--- | -----      |
| AGL56  | SRMLN----- | NVR--CRLND | AVK-S-----  | TQRDGGLEIL  | HHQE-----  | ----EVLQ T |
| AGL55  | NVR--LRLDD | AVK-S----- | NQRDGS L-VI | HQED-----   | ----EVLQ L | -----      |
| AGL99  | SKMLK----- | DLK-DLQNR  | DCEEDVKKKG  | VLHGTHQKQT  | FNPE-----  | ----SCSVNF |
| AGL39  | QRMKK----- | HVMACLEKEE | KSQLV-----  | SSFDQNPNST  | CSLDVEDCDG | SSYSQIASTF |
| AGL60  | SVLRE----- | NLL--TRIYQ | MSGD-----   | RTVEN-----  | -----      | -----      |
| AGL100 | SMLRE----- | NIG--KKIVA | MGND-----   | RTVDM-----  | -----      | -----      |
| AGL33  | -----      | -----      | -----       | -----       | -----      | -----      |

|        |             |             |             |             |             |             |
|--------|-------------|-------------|-------------|-------------|-------------|-------------|
|        | ..... ..... | ..... ..... | ..... ..... | ..... ..... | ..... ..... | ..... ..... |
|        | 305         | 315         | 325         | 335         | 345         | 355         |
| AGL43  | -----       | -----ASNF   | NQDYFSALLE  | QSELKN----- | ---QLMKQEI  | CGNDQONQMW  |
| AGL75  | -----       | -----ASNF   | NQDYFSALLE  | ESELKN----- | ---QLMKPEI  | CGYDQONQMS  |
| AGL76  | -----       | -----ASNF   | NQNYFSALLE  | QSELKN----- | ---QLMKQD-  | -GYDQONQMR  |
| AGL81  | -----       | -----ASNF   | NQDYFSALLE  | QSELKS----- | ---QIMKQDL  | CGYEQONCMMS |
| AGL98  | -----       | -----ASNF   | NQDYFSALLE  | QSELKS----- | ---QIMKQEV  | CGYEQONCMMS |
| AGL77  | -----       | -----ASNF   | NQDYISALLE  | QSELKS----- | ---QIMKQEV  | CGYEQONCMMS |
| AGL78  | -----       | -----APHS   | NQLINYQNHL  | MQHGFQ----- | ---QNMCSDN  | ITNNN-FEHP  |
| AGL52  | -----       | -----ASQS   | NQLINYQ---  | MQHGFQ----- | ---QNMCLDN  | ITNNNNFQHP  |
| AGL51  | -----       | -----ASLS   | NQLQLPES--  | -----       | -----       | -----       |
| AGL103 | -----       | -----ALASNQ | TQSLAPIPPE  | LMIYPN----- | ---SDAGNYS  | GSLGVQGTGI  |
| AGL93  | -----       | -----VSNT   | EQDLSTSSLS  | QNQSKF----- | ---SVFLYN-  | -----       |
| AGL53  | -----       | -----VSNT   | EQDLSTSSLS  | QNQSRI----- | ---SVFLYN-  | -----       |
| AGL54  | -----       | -----E---   | -----       | -----       | -----       | -----       |
| AGL89  | -----       | -----VSNT   | EQDLSTSPLS  | NHQSKY----- | ---SVFVYN-  | -----       |
| AGL26  | -----       | -----       | -----       | -----       | -----       | -----       |
| AGL101 | -----       | -----KQNL   | TKKKSTKIFE  | KQNFLK----- | ---CFFIYG-  | -----       |
| AGL50  | -----       | -----KLG    | SCDVFDELAY  | VVRGS-----  | ---RNLNENV  | SKYE-----   |
| AGL49  | -----       | -----KLG    | SCDVFDELAY  | VVRGS-----  | ---RNLNENV  | SNYE-----   |
| AGL36  | SPIHATTGVV  | DTLNATNPHV  | LTGDMTPFLD  | ADATAVTASS  | RFFDHLIYEN  | MNMSQNLHEP  |
| AGL90  | SPIHSTTRVV  | DTPNATNPHV  | LAGDMTPFLD  | ADANAVTAPS  | RFSDHIQYEN  | MNMSQNLHEP  |
| AGL34  | SPILATTVVV  | DTPNATNPRV  | LVADTTHFLD  | ANATAVTAPF  | GF'SNHIQYKN | MNMSQDLHRP  |
| AGL37  | -----       | -----PTV    | VDSVPIGFD   | G-----      | ---RMIQDQN  | QNQ-----    |
| AGL38  | -----       | -----LP IV  | ANAAAPVGFD  | G-----      | ---PMFQYHN  | QNQ-----    |
| AGL86  | VAGAGAGAGA  | APLVVAGAGA  | APLAVAGAGA  | S-----      | -----       | -----       |
| AGL92  | VPPLFAVAGA  | NLPVVADQAA  | VTVPPLFAVA  | G--ANLPVVA  | DQAAVNVPTG  | FHNMMNVQNG  |
| AGL35  | -----       | -----       | TTSSVMPVVE  | MGSSS-----  | -----       | -----       |
| AGL80  | -----       | -----PNLVA  | TTAPTPTIYE  | VGSSSS----- | ---FAAVANF  | VNP-----    |
| AGL46  | -----       | -----TAT    | TGNMATTVVD  | EG-----     | -----       | -----       |
| AGL45  | -----       | -----GAT    | NAMTPTS VVE | NPNFN-----  | -----       | -----       |
| AGL48  | GGGQD-----  | -----NKRAG  | RTDEATRFIN  | TDIFK-----  | ---QSKSYFF  | FDEWVFPSP   |
| AGL41  | GGDL D----- | -----VERAR  | NTNEATRIIN  | IDSLR-----  | ---ENKSYLL  | IDQWFPTPEP  |
| AGL96  | -----       | -----GL     | NMMETGRSFY  | YVDK-----   | -----       | -----       |
| AGL87  | -----       | -----D---   | -----       | -----       | -----       | -----       |
| AGL82  | -----       | -----FQGF   | PNNFNMMGFS  | LISPHDG---  | -----       | -----       |
| AGL47  | -----       | -----TMDY   | NGLSFFPFNN  | QMTS-----   | -----       | -----       |
| AGL40  | -----       | -----       | QLISALQDVK  | KK-----     | -----       | -----       |
| AGL62  | -----       | -----       | GFKGNLENLK  | KV-----     | -----       | -----       |
| AGL23  | -----       | -----       | CMIRVLKDLK  | KI-----     | -----       | -----       |
| AGL28  | -----       | -----       | SMKCDLEALK  | KE-----     | -----       | -----       |
| AGL61  | -----       | -----       | EMKYALEELR  | KT-----     | -----       | -----       |
| AGL91  | -----       | -----       | EFEAKIKKIS  | CG-----     | -----       | -----       |
| AGL29  | -----       | -----       | EYKDR LQTVH | GR-----     | -----       | -----       |
| AGL102 | -----       | -----       | AFKAKLEAYQ  | AG-----     | -----       | -----       |
| AGL58  | -----       | -----       | KMMEKYQELK  | EK-----     | -----       | -----       |
| AGL59  | -----       | -----       | KMMEKYQELY  | DK-----     | -----       | -----       |
| AGL85  | -----       | -----       | KIMEKCEGLY  | EK-----     | -----       | -----       |
| AGL88  | -----       | -----       | ---QAMLELR  | DN-----     | -----       | -----       |
| AGL57  | -----       | -----       | QRYQAMLELR  | DN-----     | -----       | -----       |

|        |         |                 |            |            |             |            |
|--------|---------|-----------------|------------|------------|-------------|------------|
| AGL84  | -----   | -----DFVS       | DHETHDQTLI | LQSASPICCI | PENLNEITQE  | PNQTLNIQSS |
| AGL73  | -----   | -----D---       | VHGTQDQTLI | FQSASAVCCI | PENLNLDITQE | PNQTLDIQSS |
| AGL83  | -----   | -----DVVL       | QHGTQYETLN | -----      | -----       | PN-----SN  |
| AGL56  | RN----- | -----           | -----      | -----      | -----       | -----      |
| AGL55  | GY----- | -----           | -----      | -----      | -----       | -----      |
| AGL99  | DG----- | FN KNTTEFDLDE   | IFDYVSTAEA | LSMNLDMDDV | SVVTTN----  | -----      |
| AGL39  | TP----- | NSVN EYCSDQTFSS | FH--GDQNP  | NLSSPSFDQD | CY--SS----  | -----      |
| AGL60  | -----   | -----           | LPAPFNEMAM | AD-----    | -----       | -----      |
| AGL100 | -----   | -----           | VPAWPINVMG | WK-----    | -----       | -----      |
| AGL33  | -----   | -----           | -----      | -----      | -----       | -----      |

|        |            |             |              |            |            |             |
|--------|------------|-------------|--------------|------------|------------|-------------|
|        | .... ....  | .... ....   | .... ....    | .... ....  | .... ....  | .... ....   |
|        | 365        | 375         | 385          | 395        | 405        | 415         |
| AGL43  | -MG-----   | -----NITNNN | FQLPCVSNKE   | -VQESVNNFG | -----      | -----       |
| AGL75  | -MG-----   | -----DITNNK | FQDPCVSNKE   | AVQESVNNFG | L-----     | -----       |
| AGL76  | -MG-----   | -----DITNNN | FQLPYFSKKE   | AVQESVNYFG | M-----     | -----       |
| AGL81  | NHG-----   | -----DATLSQ | IPLSASNLNQ   | DFSALLQDES | -----      | -----       |
| AGL98  | NNG-----   | -----DATLSQ | IPLSASNFNQ   | EFSALLQEES | -----      | -----       |
| AGL77  | NHG-----   | -----DATLSQ | IPFSASNFNQ   | DFSANNNFQH | SFVSNTQDYD | SVQKSVNNNY  |
| AGL78  | -GV-----   | -----SNTQDY | SPLLSVQASA   | VNNYGLNHL  | M-----     | -----       |
| AGL52  | -GV-----   | -----SNTQDY | SPLLS-----   | ANNYGLNHL  | M-----     | -----       |
| AGL51  | -----      | -----LDA    | AWFWS-----   | --EHVFGQHH | Q-----     | -----       |
| AGL103 | -NG-----   | -----LQNMNM | LTYNINSVN    | DFSKQFDQ-N | S-----     | -----       |
| AGL93  | -----      | -----HDNCS  | FYQVP-----   | ---DSVSSFD | S-----     | -----       |
| AGL53  | -----      | -----HDNRS  | FYQVP-----   | ---DSVSSFD | -----      | -----       |
| AGL54  | -----      | -----       | -----        | -----      | -----      | -----       |
| AGL89  | -----      | -----HDSGS  | FYQVP-----   | ---DSICF-- | -----      | -----       |
| AGL26  | -----      | -----       | -----        | -----      | -----      | -----       |
| AGL101 | -----      | -----VIFS   | EIKPT-----   | --AQFVSLG  | -----      | -----       |
| AGL50  | -----      | -----SKD    | ADNTG-----   | --LDHLVTLG | G-----     | -----       |
| AGL49  | -----      | -----SKD    | AAVTG-----   | --MDHLGTFG | G-----     | -----       |
| AGL36  | FQHLVPTNVC | DFQONQNMNQ  | VQYQAP-----  | --NNLNFQIQ | R-----     | -----       |
| AGL90  | FQHLVPTNVC | DFYQONQNMNQ | VQYQAP-----  | --NNLNFQIQ | R-----     | -----       |
| AGL34  | FQHLVPTNFC | DFQONQNMNQ  | VQYQAPP----- | --NDMFNQIQ | R-----     | -----       |
| AGL37  | -----      | -----QEPVQ  | FQYQAL-----  | --YDFYDQIP | K-----     | -----       |
| AGL38  | -----      | -----QKPVQ  | FQYQAL-----  | --YDFYDQIP | K-----     | -----       |
| AGL86  | -----      | -----       | -----        | ---PLAVAG  | VGA-----   | -----       |
| AGL92  | YEPVQPYVPT | GFSDHQYQN   | MNFNQNQEP    | VHYQALAVAG | AGLPMTQN-- | -----       |
| AGL35  | -----      | -----       | -----        | --VGFYDKVR | -----      | -----       |
| AGL80  | -----      | -----IDLQ   | FRHPAAQH--   | --VGLNEQPQ | N-----     | -----       |
| AGL46  | -----      | -----MTPLL  | IAEGSSSS-F   | LNSPLFNSPQ | -----      | -----       |
| AGL45  | -----      | -----HLSHNQ | YQYQQQFG--   | --YPILVQDG | -----      | -----       |
| AGL48  | PKY-----   | -----EIPQQ  | MENGNPN--    | --PKSYRLYQ | G-----     | -----       |
| AGL41  | PKP-----   | -----VTYQQ  | IGYETSN--    | --RRGYNPYQ | G-----     | -----       |
| AGL96  | -----      | -----WVFD   | PQVQNP-----  | --CDVETHLP | T-----     | -----       |
| AGL87  | -----      | -----       | -----        | -----      | -----      | -----       |
| AGL82  | -----      | -----QIQMD  | PNLMEKWTDL   | ALTQSLMMSK | G-----     | -----       |
| AGL47  | -----      | -----NTAEV  | SSFSNVT--    | --EPMIANGQ | S-----     | -----       |
| AGL40  | -----      | -----LVREM  | SQYSQVN--    | --VSQNYFGQ | SS-----    | -----       |
| AGL62  | -----      | -----VTVEA  | SRFFQAN--    | --VPNFYVGS | SSNNAAF--  | -----       |
| AGL23  | -----      | -----VDEKA  | IQLIHQT--    | --NPNFYVGS | SSNAAAP--  | -----       |
| AGL28  | -----      | -----VDEKV  | AQLHHR--     | --NLNFYVGS | SSNVAAP--  | -----       |
| AGL61  | -----      | -----VVTNM  | ASFNEAK--    | --DDVFGFLD | NK-----    | -----       |
| AGL91  | -----      | -----IQSNI  | SHMQASS--    | --SLMFLSND | N-----     | -----       |
| AGL29  | -----      | -----IEGQV  | NHLQASS--    | --CLMLLSRK | -----      | -----       |
| AGL102 | -----      | -----LKRKH  | VEMEDLS--    | --SPSILSK- | -----      | -----       |
| AGL58  | -----      | -----LREEV  | ALRIKRG--    | --HDENNNK- | -----      | -----       |
| AGL59  | -----      | -----LCEQA  | ASRIKRG--    | --HDENNNK- | -----      | -----       |
| AGL85  | -----      | -----LCNEA  | AARIQRG--    | --DAENNNK- | -----      | -----       |
| AGL88  | -----      | -----LS     | -----        | -----      | -----      | -----       |
| AGL57  | -----      | -----LCDNM  | AHLRLGK--    | --DCGGSSS- | -----      | -----       |
| AGL84  | TSA-----   | -----ICCP   | DNSPENF--    | --NEITEEQD | QIRSICTFC  | VMDNN----   |
| AGL73  | SSA-----   | -----ICCP   | DKSPEIF--    | --NEITEEQD | QILSICTFC  | VTDNNNNNNN  |
| AGL83  | TTT-----   | -----ICCP   | DELPAANS--   | --NEIVGISP | -----      | -----N----- |
| AGL56  | -----      | -----D---   | ---ETKT--    | --NQTHEFEG | G-----     | -----       |
| AGL55  | -----      | -----       | ---KDT--     | --NQITKLEG | -----      | -----       |
| AGL99  | -----      | -----QNPVS  | ASETVED--    | --RELVVHKN | MD-----    | -----       |
| AGL39  | -----      | -----LYQIC  | GESSSQV--    | --ASFDQNP  | SE-----    | -----       |
| AGL60  | -----      | -----       | ---WKL--     | --NENLMARN | -----      | -----       |

AGL100 ----- --PTMD-- --MQKLENTL-----  
 AGL33 -----

|        | .... ....  | .... ....   | .... ....   | .... ....  | .... ....   | .... ....   |
|--------|------------|-------------|-------------|------------|-------------|-------------|
|        | 425        | 435         | 445         | 455        | 465         | 475         |
| AGL43  | ----LMHKE  | FYGCDHNMSV  | GNINSNSCEH  | -----      | PCVSSTQHYS  | AVEESVNNPW  |
| AGL75  | ---NQLMYKE | FYGCDQNMSM  | GNINSNSFQN  | -----      | PCVSNTQHYS  | AVEESVKNPW  |
| AGL76  | ---NQLMLKE | LYGCDQNMCM  | GNINSNSFQH  | -----      | PCVSKAQHYS  | AVEGVSNNQR  |
| AGL81  | ---GLMQQE  | LCGYDQNMFM  | NNN-NFQHSF  | -----      | VSNTQDHSAP  | VVQESVNNN-  |
| AGL98  | ---GLMQQE  | LCNYDQNMFM  | NNN-NFQHSF  | -----      | VSNTQDHSAP  | AVQESVNNN-  |
| AGL77  | GLKNQLMKHD | LCGYEHNMCM  | SNHGDATAFSQ | -----      | IPLSASFNFQ  | DFSVSIQEE-  |
| AGL78  | ----QQDQ   | LHGFDQNMCM  | VSE----I--  | -----      | INNNGLQHP   | NLSNTVPHEF  |
| AGL52  | ----QQDQ   | LHGFDQNLCM  | MSE----I--  | -----      | INNNGLQHP   | NLSNTVPHEF  |
| AGL51  | ----QQ--   | -----       | -----       | -----      | LSTSWRVKHT  | RIL-----    |
| AGL103 | ---RAESY   | SSLLGVHEDG  | NNEFE----   | -----      | NPNMSSRNNF  | NVQDCAGLLG  |
| AGL93  | ----LTSTG  | LLGEQGSGLG  | SSFDLP-MVF  | -----      | PPQMQTQTP   | VFPDQFAPWN  |
| AGL53  | -----QSA   | LLGEQGSGLG  | SNFDLPPMVF  | -----      | PPQMQTQTP   | VFPDQFAAWN  |
| AGL54  | -----      | -----       | -----       | -----      | -----       | -----       |
| AGL89  | -----      | -----       | -----       | -----      | -----       | -----       |
| AGL26  | -----      | -----       | -----       | -----      | -----       | -----       |
| AGL101 | -----      | LVKSISN-II  | WKYKNFTILY  | -----      | NPEPCKKTKL  | SVR-----    |
| AGL50  | -----D     | YLQEAAAELY  | QTYNLGNFCD  | -----      | -DHVWDLLEFA | SRLPLLHTFS  |
| AGL49  | -----N     | YLQEAAAELY  | QTYNLGNFCD  | -----      | -DHVWDLLEFA | SRLPLLHTFS  |
| AGL36  | -----E     | FYNINLNLNL  | NLNSNQYLNQ  | QSF---MN   | PMVEQHMNHV  | GGRESIPFVD  |
| AGL90  | -----E     | FYNINLNLNL  | NLNSNQYLNQ  | QSF---MN   | PMVEQHMNHV  | GGRESIPFVD  |
| AGL34  | -----E     | FYNINLNQ--  | --KSNQYMNQ  | QPF---MN   | PMVEQHMSHV  | GGRESIPFMD  |
| AGL37  | -----K     | LHDFNMKMN-  | -IDPNQ----  | -----      | -SMNLDLNDG  | ED-EGIPCMD  |
| AGL38  | -----K     | IHGFMNMN-   | -KDSNQSMVL  | -----      | -DLNQLNDG   | ED-EGIPCMD  |
| AGL86  | -----      | ---APLAVAG  | AGPPMAQNQY  | EPIQPYIPTA | FSDNIQYQAP  | VDFNHQIQHG  |
| AGL92  | -----QYEP  | VHYQSLAVAG  | GGLPMSQLQY  | EPVQPYIPTV | FSDNVQYQHM  | NLYQNQQEPV  |
| AGL35  | -----      | -----       | -----       | -----      | -----       | -----       |
| AGL80  | -----L     | NLNLNQNYN-  | --QNQE-WFM  | EMM-----   | -NHPEQMRYQ  | TEQMGYQFMD  |
| AGL46  | -----      | LTN-----    | -----       | -----E     | LQLIVSQNHR  | LENSLASANLF |
| AGL45  | -----      | IYN-----    | -----       | -----      | PSQIQNQHEE  | WLDDHMMNHS  |
| AGL48  | -----S     | SSNGNPHLEM  | DPFRLQMMTS  | QGLAGSVSQP | LQHHSMINNP  | TMAMNQPSQD  |
| AGL41  | -----S     | SSNGNPNFEM  | MSVSPK----  | -----      | -----       | -----       |
| AGL96  | -----      | -----       | -----       | -----      | MVSGLDLME   | PSDEDLGTYK  |
| AGL87  | -----      | -----       | -----       | -----      | -----       | -----       |
| AGL82  | -----ND    | GTQFMQRQEQ  | PYYNREQVVS  | -----      | RSAGFVNVPF  | MGYQVPFNIP  |
| AGL47  | -----L     | FYGSCSDGPGY | GPMVQR----  | -----      | TAYMEPIHWG  | LGNSMFNNVK  |
| AGL40  | -----GV    | IGG--GNVGI  | DLFDQR----  | -----R     | NAFNYNPNMV  | FPNHTPPMFG  |
| AGL62  | -----GI    | DDGSHINPDM  | DLFSQRRMMD  | -----I     | NAFNYNQNI   | HPNHALPPFG  |
| AGL23  | -----AT    | VSG-----    | -----       | -----      | --GNISTNQG  | FFDQNGMTTN  |
| AGL28  | -----AA    | VSG-----    | -----       | -----      | --GNISTNHG  | FFDQNGNSTS  |
| AGL61  | -----      | -----       | -----       | -----      | ---VT---    | VPPYVNMPSG  |
| AGL91  | -----      | -----       | -----       | -----      | -----       | -----       |
| AGL29  | -----      | -----       | -----       | -----      | -----       | -----       |
| AGL102 | -----      | -----       | -----       | -----      | --NTKNKMMR  | TEYSSGQSKG  |
| AGL58  | -----      | -----       | -----       | -----      | -----       | -----       |
| AGL59  | -----      | -----       | -----       | -----      | -----       | -----       |
| AGL85  | -----      | -----       | -----       | -----      | -----       | -----       |
| AGL88  | -----      | -----       | -----       | -----      | -----       | -----       |
| AGL57  | -----      | -----       | -----       | -----      | --VRVGRRVS  | GGVRLFDREA  |
| AGL84  | -----AA    | LPEMNLDY--  | ---DQDIGF   | -----D     | TPFESALNDW  | FSDNTTHQEI  |
| AGL73  | N-----AA   | LPEVNLYYNQ  | DMAIDQLIDF  | -----N     | TPFESSIDDW  | FSDNTTHQET  |
| AGL83  | -----      | -PLIMLEK--  | -----KKS    | -----Q     | IEEK-FEKEW  | QVSVTRIENE  |
| AGL56  | -----      | -----       | -----       | -----      | --ETSGSASW  | LENEDDILHF  |
| AGL55  | -----      | -----       | -----       | -----      | --ETSASASL  | LKNVVDNLHI  |
| AGL99  | -----EDN   | IHVSDMDDKD  | TMLMISDKNN  | -----VLP   | ENLDE-FDQE  | LDLDQLLDFE  |
| AGL39  | -----      | -----       | -----IQG    | -----      | FETEEEINQI  | NLLLQETQTE  |
| AGL60  | -----      | -----       | -----       | -----      | -----DRG    | YGGNNGDLEF  |
| AGL100 | -----      | -----       | -----       | -----      | -----DGV    | NRCRVG----  |
| AGL33  | -----      | -----       | -----       | -----      | -----       | -----       |

|        | 485        | 495        | 505         | 515        | 525         | 535         |
|--------|------------|------------|-------------|------------|-------------|-------------|
| AGL43  | L-----     | -----N     | QLMQNELYGY  | GRKVLDAASF | TSFESSWIIG  | GLLIT-----  |
| AGL75  | L-----     | -----N     | QLMQNELYGY  | G-----YAGF | C-----      | -----       |
| AGL76  | Q-----     | -----S     | ELMQQELCGY  | EQNMCFTNNN | FQVSNKEAVQ  | ESVTN-----  |
| AGL81  | -----      | -----Y     | GLMPHVPCGY  | DQN--LFTSD | ITNNNLLINN  | SMFL-----   |
| AGL98  | -----      | -----Y     | GLMPHVPCGY  | DQN--LFTSD | ITNNNLLIDN  | SMFL-----   |
| AGL77  | -----      | -----S     | GLMQQELCGY  | DQNQNMSMGD | ITNNNFQVTC  | ASVLESVNNF  |
| AGL78  | -----      | -----S     | SDFNQNPYGN  | A-----VG-N | LSFSQDMFSS  | YDASS-----  |
| AGL52  | -----      | -----P     | -----       | -----YG-N  | TSFSQDMFSS  | YDGSS-----  |
| AGL51  | -----      | -----      | -----       | -----T     | VSFGTSICSE  | -----       |
| AGL103 | -----      | -----      | MQGAGTNGLQ  | -----SM-N  | MHDYSNNNSI  | NSNGLSHQYV  |
| AGL93  | -----      | -----      | -----       | -----QA    | PSFADPMMPF  | YN-----     |
| AGL53  | -----      | -----      | -----       | -----QA    | PSFADPMMPF  | YN-----     |
| AGL54  | -----      | -----      | -----       | -----      | -----       | -----       |
| AGL89  | -----      | -----      | -----       | -----      | -----       | -----       |
| AGL26  | -----      | -----      | -----       | -----      | -----       | -----       |
| AGL101 | -----      | -----      | -----       | -----      | -----       | -----       |
| AGL50  | -----      | -----      | -----       | -----DPL   | MTTNTCQTMS  | TDMISI----- |
| AGL49  | -----      | -----      | -----       | -----DPL   | MTTNTCQTMS  | SDMISI----- |
| AGL36  | -----      | -----      | GNCYNYHQLP  | SNQLPAVDHA | STSYMPSTTG  | VYDPY-----  |
| AGL90  | -----      | -----      | RNYNYNQPLP  | -----AVDLA | STSYMPSTTD  | VYDPY-----  |
| AGL34  | -----      | -----      | GNYNYNQPLP  | -----VVDHG | STSYMPSTTG  | VYDPY-----  |
| AGL37  | -----      | -----      | -----NNNYHP | -----EIDCL | ATVTT-APT   | VCAPN-----  |
| AGL38  | -----      | -----      | -----NNNYHP | -----EIDCL | ATVTT-APTD  | VCAPN-----  |
| AGL86  | IYDNLSLDPN | -----      | -----HQY    | PFQDDPFMEM | LMEYPYEQVG  | YAAEHAHIPF  |
| AGL92  | HYQALGVAGA | GLPMNQNYE  | PVQPYVPTGF  | SDHFQFENMN | LNQNOQEPVQ  | YQAPVDFNHQ  |
| AGL35  | -----      | -----      | -----DQIQI  | TLNMQTTND  | LDLNK-----  | -----       |
| AGL80  | -----      | -----      | DNHHNH1HHQ  | -----PQEHQ | HQIHDESSNA  | LDAANSS---- |
| AGL46  | FS-----    | -----      | -----       | -----EG    | QDICIPDMNQ  | VCML-----   |
| AGL45  | -----      | -----      | -----       | -----KE    | ISHPLMDDNN  | FYYQQP----- |
| AGL48  | PFDYMRSELG | INEGININNS | QFYMSNNTIT  | ANDGVRQEPY | PNVTTAGENN  | GDATTS----- |
| AGL41  | -----      | -----      | -----       | -----GE    | SSMAGGAEDD  | AE-----     |
| AGL96  | -----      | -----      | -----       | -----      | -----       | -----       |
| AGL87  | -----      | -----      | -----       | -----      | -----       | -----       |
| AGL82  | N-----     | -----      | -----       | -----WRLSG | NQVENWELSG  | KKTI-----   |
| AGL47  | -----      | -----      | -----       | -----QFQD  | YPFRFAQVND  | LEDSSKLSM-  |
| AGL40  | -----      | -----      | -----       | YNNQDGLVPI | SNMNYMSSYN  | FNQS-----   |
| AGL62  | NNA-----   | -----      | -----       | YGINEGFVPE | YNVNFRPEYN  | PNQIQIQNQN  |
| AGL23  | P-----     | -----      | -----       | -----TQT   | LLFGFDIMNR  | TPGV-----   |
| AGL28  | -----      | -----      | -----       | -----APT   | LPPGFNVMMNR | TPAGYNSYQL  |
| AGL61  | -----      | -----      | -----       | -----PS    | NIYNFANGNG  | CF-----     |
| AGL91  | -----      | -----      | -----       | -----      | -----       | -----       |
| AGL29  | -----      | -----      | -----       | -----      | -----       | -----       |
| AGL102 | MYEFRAFPG  | FLGTI----- | -----       | -----      | -----       | -----       |
| AGL58  | -----      | -----      | -----       | -----      | -----       | -----       |
| AGL59  | -----      | -----      | -----       | -----      | -----       | -----       |
| AGL85  | -----      | -----      | -----       | -----      | -----       | -----       |
| AGL88  | -----      | -----      | -----       | -----      | -----       | -----       |
| AGL57  | -----      | -----      | -----       | -----      | -----       | -----       |
| AGL84  | -----      | -----      | -----       | -----SAS   | ILN--AVVDD  | QVSVDLTPFS  |
| AGL73  | -----      | -----      | -----       | -----TSA   | SILNDVGVD   | QVSDVTPNPF  |
| AGL83  | -----      | -----      | -----       | -----ATS   | SYAK-----R  | RRSI-----   |
| AGL56  | -----      | -----      | -----       | -----DDD   | FYTG----ID  | PLF-----    |
| AGL55  | -----      | -----      | -----       | -----DDR   | YY-----     | -----       |
| AGL99  | TNYESLLKSC | EMEDYASM-- | -----       | -----VTT   | KQNLCSNPEA  | VEDG-----   |
| AGL39  | ANVNLDEIC  | FWNDLSND-- | -----       | -----DVF   | GLN-----S   | -----       |
| AGL60  | -----      | -----      | -----       | -----AFM   | PQNG-----R  | Q-----      |
| AGL100 | -----      | -----      | -----       | -----QNG   | -----D      | -----       |
| AGL33  | -----      | -----      | -----       | -----      | -----       | -----       |

|       | 545        | 555        | 565        | 575        | 585        | 595      |
|-------|------------|------------|------------|------------|------------|----------|
| AGL43 | --SQYLLVSV | WYILQSQVME | IYPEEITVVF | FYNLCGMLIS | PPVCRKRLDL | LAA----- |
| AGL75 | -----      | -----      | -----      | -----      | -----      | -----    |
| AGL76 | --FGLMQHEL | YGCDQNMSG  | NIINNSFQQR | LKHRTRICE- | -----      | -----    |
| AGL81 | -----      | -----      | -----      | -----      | -----      | -----    |
| AGL98 | -----      | -----      | -----      | -----      | -----      | -----    |
| AGL77 | GLNQLMHKEF | YGCHQNMSG  | NINNSFQHP  | WVSNADHTRR | YKNL-----  | -----    |
| AGL78 | --LQTSLSL  | PLHNIPSSYC | FPGNSRLL-- | -----      | -----      | -----    |



|        |            |            |            |            |            |            |
|--------|------------|------------|------------|------------|------------|------------|
| AGL52  | -----      | --LLQTSSLP | PLHNIPNSYC | FSDNSRLLC- | -----      | -----      |
| AGL51  | -----      |            |            |            | -----      | -----      |
| AGL103 | QF-----    | -----      | PTYNS      | QHQDRVFNLD | QNGNTRSL-  | -----      |
| AGL93  | -----      |            |            |            |            | -----      |
| AGL53  | -----      |            |            |            |            | -----      |
| AGL54  | -----      |            |            |            |            | -----      |
| AGL89  | -----      |            |            |            |            | -----      |
| AGL26  | -----      |            |            |            |            | -----      |
| AGL101 | -----      |            |            |            |            | -----      |
| AGL50  | -----      |            |            |            |            | -----      |
| AGL49  | -----      |            |            |            |            | -----      |
| AGL36  | -----      |            |            | -INNLL-    |            | -----      |
| AGL90  | -----      |            |            | -INNLL-    |            | -----      |
| AGL34  | -----      |            |            | -FNLL-     |            | -----      |
| AGL37  | -----      |            |            | -IINDL-    |            | -----      |
| AGL38  | -----      |            |            | -ITNDL-    |            | -----      |
| AGL86  | MNGNYNYHQ  | PPTVGLTTTG | HMPSNNA--- | -----      | -----      | -----      |
| AGL92  | IQQGNYDMNL | NQNMKHAHIP | FMDGNYNYH  | QPPTVGLTST | GHMPSTTTT  | TNNNNNNNV- |
| AGL35  | -----      |            | -KQW-      |            |            | -----      |
| AGL80  | -----      | --SIIPVTSS | SITNKTWFH- |            |            | -----      |
| AGL46  | -----      |            |            |            |            | -----      |
| AGL45  | -----      |            |            |            |            | -----      |
| AGL48  | -----      |            |            | -NTNMVWPGF | NNHFF-     | -----      |
| AGL41  | -----      |            |            |            |            | -----      |
| AGL96  | -----      |            |            |            |            | -----      |
| AGL87  | -----      |            |            |            |            | -----      |
| AGL82  | -----      |            |            |            |            | -----      |
| AGL47  | -----      |            |            |            |            | -----      |
| AGL40  | -----      |            |            |            |            | -----      |
| AGL62  | QVQIQIQNS  | FKRENISEYE | HHHGYPQSR  | SDYY-----  |            | -----      |
| AGL23  | -----      |            |            |            |            | -----      |
| AGL28  | QNQEVKQVHP | QYWARYY--- |            |            |            | -----      |
| AGL61  | -----      |            |            |            |            | -----      |
| AGL91  | -----      |            |            |            |            | -----      |
| AGL29  | -----      |            |            |            |            | -----      |
| AGL102 | -----      |            |            |            |            | -----      |
| AGL58  | -----      |            |            |            |            | -----      |
| AGL59  | -----      |            |            |            |            | -----      |
| AGL85  | -----      |            |            |            |            | -----      |
| AGL88  | -----      |            |            |            |            | -----      |
| AGL57  | -----      |            |            |            |            | -----      |
| AGL84  | YFQRCLDGDN | LRFSDFSSPN | SCDENMTKAT | KPLEPQKDEK | QLVPEEALIV | LAGPLTRSKS |
| AGL73  | YFQSLEDADL | VFQRCLDGDN | -----      |            |            | -----      |
| AGL83  | -----      |            |            |            |            | -----      |
| AGL56  | -----      |            |            |            |            | -----      |
| AGL55  | -----      |            |            |            |            | -----      |
| AGL99  | -----      | -GLMIQKDLP | EDNLCFSDYF | SDLHC----- |            | -----      |
| AGL39  | -----      | -YFGLDNTNA | MINFGDSDFR | RHV-----   |            | -----      |
| AGL60  | -----      |            |            |            |            | -----      |
| AGL100 | -----      |            |            |            |            | -----      |
| AGL33  | -----      |            |            |            |            | -----      |

|        |           |           |           |        |
|--------|-----------|-----------|-----------|--------|
|        | .... .... | .... .... | .... .... | .... . |
|        | 605       | 615       | 625       | 635    |
| AGL43  | -----     | -----     | -----     | -----* |
| AGL75  | -----     | -----     | -----     | -----* |
| AGL76  | -----     | -----     | -----     | -----* |
| AGL81  | -----     | -----     | -----     | -----* |
| AGL98  | -----     | -----     | -----     | -----* |
| AGL77  | -----     | -----     | -----     | -----* |
| AGL78  | -----     | -----     | -----     | -----* |
| AGL52  | -----     | -----     | -----     | -----* |
| AGL51  | -----     | -----     | -----     | -----* |
| AGL103 | -----     | -----     | -----     | -----* |
| AGL93  | -----     | -----     | -----     | -----* |
| AGL53  | -----     | -----     | -----     | -----* |
| AGL54  | -----     | -----     | -----     | -----* |
| AGL89  | -----     | -----     | -----     | -----* |
| AGL26  | -----     | -----     | -----     | -----* |
| AGL101 | -----     | -----     | -----     | -----* |
| AGL50  | -----     | -----     | -----     | -----* |

```

AGL49      -----*
AGL36      -----*
AGL90      -----*
AGL34      -----*
AGL37      -----*
AGL38      -----*
AGL86      -----*
AGL92      -----*
AGL35      -----*
AGL80      -----*
AGL46      -----*
AGL45      -----*
AGL48      -----*
AGL41      -----*
AGL96      -----*
AGL87      -----*
AGL82      -----*
AGL47      -----*
AGL40      -----*
AGL62      -----*
AGL23      -----*
AGL28      -----*
AGL61      -----*
AGL91      -----*
AGL29      -----*
AGL102     -----*
AGL58      -----*
AGL59      -----*
AGL85      -----*
AGL88      -----*
AGL57      -----*
AGL84      KKFNQAINGL LKELKKNQED VTQSSFIVIT AQEAR*
AGL73      LRFSDCFNDF ANTIAAV--- -----*
AGL83      -----*
AGL56      -----*
AGL55      -----*
AGL99      -----*
AGL39      -----*
AGL60      -----*
AGL100     -----*
AGL33      -----*

```

Detection of positive selection analyses refer to positions in this alignment.
