# Supplementary material
Source: PubMed Central journal article supplement (PMC263827)
Supplement: pnas_100_23_13407__4.pdf [file pnas_100_23_13407__4.pdf]

**Table 5. Type II MADS domain sequences**

|        | ← MADS Domain → |             |             |             |             |             |
|--------|-----------------|-------------|-------------|-------------|-------------|-------------|
|        | ..... .....     | ..... ..... | ..... ..... | ..... ..... | ..... ..... | ..... ..... |
|        | 5               | 15          | 25          | 35          | 45          | 55          |
| SEP1   | MGRGRVELKR      | IENKINRQVT  | FAKRRNGLLK  | KAYELSVLCD  | AEVALIIFSN  | RGKLYEFCSS  |
| SEP2   | MGRGRVELKR      | IENKINRQVT  | FAKRRNGLLK  | KAYELSVLCD  | AEVSLIVFSN  | RGKLYEFCST  |
| SEP3   | MGRGRVELKR      | IENKINRQVT  | FAKRRNGLLK  | KAYELSVLCD  | AEVALIIFSN  | RGKLYEFCSS  |
| AGL3   | MGRGKVELKR      | IENKINRQVT  | FAKRRNGLLK  | KAYELSVLCD  | AEIALIIFSN  | RGKLYEFCSS  |
| AGL13  | MGRGKVEVKR      | IENKITRQVT  | FSKRKSGLLK  | KAYELSVLCD  | AEVSLIIFST  | GGKLYEFSNV  |
| AGL6   | MGRGRVEMKR      | IENKINRQVT  | FSKRRNGLLK  | KAYELSVLCD  | AEVALIIFSS  | RGKLYEFGSV  |
| CAL    | MGRGRVELKR      | IENKINRQVT  | FSKRRTGLLK  | KAQEISVLCD  | AEVSLIVFSS  | KGKLFYSSE   |
| AP1    | MGRGRVQLKR      | IENKINRQVT  | FSKRRTGLLK  | KAHEISVLCD  | AEVALVVFSS  | KGKLFYESTD  |
| FUL    | MGRGRVQLKR      | IENKINRQVT  | FSKRRTGLLK  | KAHEISVLCD  | AEVALVVFSS  | KGKLFYESTD  |
| AGL79  | MGRGRVQLRR      | IENKIRQVT   | FSKRRTGLVK  | KAQEISVLCD  | AEVALVVFSS  | KGKLFYSAG   |
| FLF    | MGRKKLEIKR      | IENKSSRQVT  | FSKRRNGLIE  | KARQLSVLCD  | ASVALLVVSA  | SGKLYSFSSG  |
| SHP1   | LGRGKIEIKR      | IENTTNRQVT  | FKRRNGLLK   | KAYELSVLCD  | AEVALVIFST  | RGRLYEYANN  |
| SHP2   | IGRGKIEIKR      | IENTTNRQVT  | FKRRNGLLK   | KAYELSVLCD  | AEVALVIFST  | RGRLYEYANN  |
| AG     | SGRGKIEIKR      | IENTTNRQVT  | FKRRNGLLK   | KAYELSVLCD  | AEVALVIFSS  | RGRLYEYSNN  |
| AGL11  | MGRGKIEIKR      | IENSTNRQVT  | FKRRNGLLK   | KAYELSVLCD  | AEVALVIFST  | RGRLYEYANN  |
| AGL12  | MARGKIQLKR      | IENPVHRQVT  | FKRRTGLLK   | KAKELSVLCD  | AEIGVVFSS   | QGKLFELATK  |
| AGL70  | MGRRKVEIKR      | IENKSSRQVT  | FSKRKGLIE   | KARQLSILCE  | SSIIVAVVSG  | SGKLYDSASG  |
| MAF2I  | MGRKVEIKR       | IENKSSRQVT  | FSKRRNGLIE  | KARQLSILCE  | SSIIVLVVSG  | SGKLYKSASG  |
| MAF1   | MGRRKIEIKR      | IENKSSRQVT  | FSKRRNGLID  | KARQLSILCE  | SSVAVVVVSA  | SGKLYDSSSG  |
| MAF5I  | MGRRRVEIKR      | IENKSSRQVT  | FKRRNGLME   | KARQLSILCG  | SSVALFVSS   | TGKLYNSSSG  |
| MAF4I  | MGRRKVEIKR      | IENKSSRQVT  | FKRRNGLME   | KARQLSILCE  | SSVALIISA   | TGRLYSFSSG  |
| AGL17  | MGRGKIVIQK      | IDDSTSRQVT  | FSKRKGLIK   | KAKELAILCD  | AEVCLIFSN   | TDKLYDFASS  |
| AGL21  | MGRGKIVIQK      | IDDSTSRQVT  | FSKRKGLIK   | KAKELAILCD  | AEVGLIFSS   | TGKLYDFASS  |
| ANR1   | MGRGKIVIRK      | IDNSTSRQVT  | FSKRRSGLLK  | KAKELSILCD  | AEVGVIFSS   | TGKLYDYASN  |
| AGL16  | MGRGKIAIKR      | INNSTRQVT   | FSKRRNGLLK  | KAKELAILCD  | AEVGVIFSS   | TGRLYDFSSS  |
| AGL15  | MGRGKIEIKR      | IENANSRQVT  | FSKRSGLLK   | KARELSVLCD  | AEVAVIVFSK  | SGKLFYESTT  |
| AGL18  | MGRGRIEIKK      | IENINSRQVT  | FSKRRNGLIK  | KAKELSILCD  | AEVALIIFSS  | TGKIYDFSSV  |
| SVP    | MAREKIQIRK      | IDNATARQVT  | FSKRRRGLFK  | KAELSVLCD   | ADVALIIFSS  | TGKLFYFCSS  |
| AGL24  | MAREKIRIKK      | IDNITARQVT  | FSKRRRGLFK  | KAELSVLCD   | ADVALIIFSA  | TGKLFYFCSS  |
| AGL19  | MVRGKTEMKR      | IENATSRQVT  | FSKRRNGLLK  | KAFELSVLCD  | AEVALVIFSP  | RSKLYEFCSS  |
| AGL14  | MVRGKTEMKR      | IENATSRQVT  | FSKRRNGLLK  | KAFELSVLCD  | AEVALIIFSP  | RGKLYEFCSS  |
| SOC1   | MVRGKTEMKR      | IENATSRQVT  | FSKRRNGLLK  | KAFELSVLCD  | AEVSLIIFSP  | KGKLYEFCSS  |
| AGL72  | MVRGKIEIKK      | IENVTSRQVT  | FSKRRSGLFK  | KAHELSTLCD  | AQVAAMIFSQ  | KGRLYEFCSS  |
| AGL71  | MVRGKIEIKK      | IENVTSRQVT  | FSKRRSGLFK  | KAHELSTLCD  | AQVAAMIFSQ  | SGRLEHYSSS  |
| AGL42  | MVRGKIEIKK      | IENATSRQVT  | FSKRRNGLLK  | KAYELSVLCD  | AQLSLIIFSQ  | RGRLYEFCSS  |
| PI     | MGRGKIEIKR      | IENANNRVVT  | FSKRRNGLVK  | KAKEITVLCD  | AKVALIIFAS  | NGKMIDYCCP  |
| AP3    | MARGKIQIKR      | IENQTNRQVT  | YSKRRNGLFK  | KAHELTVLCD  | ARVSIIMFSS  | SNKLEHYISP  |
| TT16   | MGRGKIEIKK      | IENQTNRQVT  | FSKRRTGLIK  | KTRELSILCD  | AHIGLIVFSA  | TGKLEFCSS   |
| AGL63  | MRGKRVIKK       | IEEKIKRQVT  | FAKRKSLIK   | KAYELSVLCD  | VHLGLIIFSH  | SNRLYDFCSN  |
| AGL104 | MGRVKLEIKR      | IENTTNRQVT  | FSKRRNGLIK  | KAYELSILCD  | IDIALIMFSP  | SDRLSLFSGK  |
| AGL66  | MGRVKLEIKR      | IENTTNRQVT  | FSKRRNGLIK  | KAYELSILCD  | IDIALIMFSP  | SDRLSLFSGK  |
| AGL67  | MGRVKLEIKR      | IEKSTNRQIT  | FSKRKGLIK   | KAYELSTLCD  | IDLALLMFSP  | SDRLCLFSGQ  |
| AGL94  | MGRVKLKIKK      | LQNMNGRQCT  | YTKRRHGIMK  | KAKELSILCD  | IDVLLMFSP   | MGKASICIGT  |
| AGL30  | MGRVKLKIKK      | LQNMNGRQCT  | YTKRRHGIMK  | KAKELSILCD  | IDVLLMFSP   | TGKAAICCGT  |
| AGL65  | MGRVKLKIKR      | LESTSNRQVT  | YTKRRNGLLK  | KAKELSILCD  | IDVLLMFSP   | TGRATAFHGE  |

|       | ← I Region → |             |             |             |             |             |
|-------|--------------|-------------|-------------|-------------|-------------|-------------|
|       | ..... .....  | ..... ..... | ..... ..... | ..... ..... | ..... ..... | ..... ..... |
|       | 65           | 75          | 85          | 95          | 105         | 115         |
| SEP1  | SN-----      | -----M      | LKTLDRYQK-  | --CSYGSIEV  | NNKPAKEL--  | -----       |
| SEP2  | SN-----      | -----M      | LKTLERYQK-  | --CSYGSIEV  | NNKPAKEL--  | -----       |
| SEP3  | SS-----      | -----M      | LRTLERYQK-  | --CNYGAPEP  | NV-PSREALA  | VE-----     |
| AGL3  | PS-----      | -G-----     | ARTVDKYRK-  | --HSYATMDP  | NQ-SAKDL--  | -----       |
| AGL13 | G-----       | -----V      | GRTIERYR-   | --CKDNLLD-  | ND-TLEDT--  | -----       |
| AGL6  | G-----       | -----I      | ESTIERYNR-  | --C-YNCCLS  | NNKPEETT--  | -----       |
| CAL   | SC-----      | -----M      | EKVLERYER-  | --YSYAEERL  | IA-PDSHVNA  | Q-----      |
| AP1   | SC-----      | -----M      | EKILERYER-  | --YSYAEERL  | IA-PESDVN-  | -----       |

|        |            |            |             |            |             |            |       |
|--------|------------|------------|-------------|------------|-------------|------------|-------|
| FUL    | SC-----    | -----M     | ERILERYDR-  | --YLYSDKQL | VGR--DVSQS  | -----      |       |
| AGL79  | SS-----    | -----M     | ERILDYER-   | --SAYAG-QD | IPTPNLDSQ-  | -----      |       |
| FLF    | DN-----    | -----L     | VKILDRYK-   | --QHADDLKA | L-----      | -----      |       |
| SHP1   | S-----     | -----V     | RGTIERYK-   | --ACSDAVN- | PPSVTEANT-  | -----      |       |
| SHP2   | S-----     | -----V     | RGTIERYK-   | --ACSDAVN- | PPTITEANT-  | -----      |       |
| AG     | S-----     | -----V     | KGTIERYK-   | --AISDNSN- | TGSVAEINA-  | -----      |       |
| AGL11  | N-----     | -----I     | RSTIERYK-   | --ACSDSTN- | TSTVQEINA-  | -----      |       |
| AGL12  | GT-----    | -----M     | EGMIDKYM-   | --CTGGGRG  | SSSATFETAQE | QLQPPNL--- |       |
| AGL70  | DN-----    | -----M     | SKIIDRYEI-  | --HHADELKA | L-----      | -----      |       |
| MAF2I  | DN-----    | -----M     | SKIIDRYEI-  | --HHADELEA | L-----      | -----      |       |
| MAF1   | DD-----    | -----I     | SKIIDRYEI-  | --QHADELRA | L-----      | -----      |       |
| MAF5I  | DS-----    | -----M     | AKIISRFKI-  | --QQADDPET | L-----      | -----      |       |
| MAF4I  | DS-----    | -----M     | AKILSRYEL-  | --EQADDLKT | L-----      | -----      |       |
| AGL17  | S-----     | -----V     | KSTIERFNT-  | --AKMEEQEL | MNPASEV---  | -----      |       |
| AGL21  | S-----     | -----M     | KSVIDRYNK-  | --SKIEQQQL | LNPASEV---  | -----      |       |
| ANR1   | SS-----    | -----M     | KTIERYNR-   | --VKEEQHQL | LNHASEI---  | -----      |       |
| AGL16  | S-----     | -----M     | KSVIERYSD-  | --AKGETSSE | NDPASEI---  | -----      |       |
| AGL15  | G-----     | -----M     | KQTLSTRYGN- | --HQSSSASK | A-----      | -----      |       |
| AGL18  | C-----     | -----M     | EQILSRYGY-  | --TTASTEHK | QOREHQLLIC  | ASHGNEA--- |       |
| SVP    | S-----     | -----M     | KEVLERHNL-  | --QSKNLEKL | DQPSLELQ-   | -----      |       |
| AGL24  | R-----     | -----M     | RDILGRYSL-  | --HASNINKL | MDPPSTHL-   | -----      |       |
| AGL19  | S-----     | -----I     | AATIERYQR-  | --RIKEIGNN | HKRNDNS---  | -----      |       |
| AGL14  | SS-----    | -----I     | PKTVERYQK-  | --RIQDLGSN | HKRNDNS---  | -----      |       |
| SOC1   | N-----     | -----M     | QDTIDRYLR-  | --HTKDRVST | KPVSEENM-   | -----      |       |
| AGL72  | D-----     | -----I     | RNTIKRYAE-  | --YKREYFVA | ETHPIEQYV-  | -----      |       |
| AGL71  | Q-----     | -----M     | EKIIDRYGK-  | --FSNAFYVA | ERPQVERYL-  | -----      |       |
| AGL42  | D-----     | -----M     | QKTIERYRK-  | --YTKDHETS | NHDSQIHL-   | -----      |       |
| PI     | SM-----    | -D-----    | L           | GAMLDQYQK- | --LS-G-KKL  | WDAKH----- |       |
| AP3    | NT-----    | -T-----    | T           | KEIVDLYQT- | --IS-D-VDV  | WATQY----- |       |
| TT16   | QN-----    | -R-----    | M           | PQLIDRYLH- | --TN-G-LRL  | -PDHDDQ--- |       |
| AGL63  | ST-----    | -S-----    | M           | ENLIMRYQK- | --EKEGQTTA  | EHSFHSQDCS | ----- |
| AGL104 | TR-----    | -----I     | EDVFSRFINL  | PKQERESALY | FDPQNRPRDI  | QNK-----   |       |
| AGL66  | TRFFVTFSLD | TSIFLIKNER | SKLTFQGFNR  | FSKDIP-LIL | FDPQSRPYI   | SRAKRYVIRL | ----- |
| AGL67  | TR-----    | -----I     | EDVLARYINL  | PDQERENAIV | FDPQSKRQGI  | QNK-----   |       |
| AGL94  | HS-----    | -----I     | GEVIAKFAQL  | SPQERAKRKL | ENLEALRKTf  | MKANHD---- |       |
| AGL30  | RR-----    | -CFSFESSEL | EENFPKVGSR  | CKYTRYSLK  | DLS-----    | -----      |       |
| AGL65  | HR-----    | -YNYQNHSYA | LKKTFFKLDH  | DVNIHDFLGA | RNQTIE----  | -----      |       |

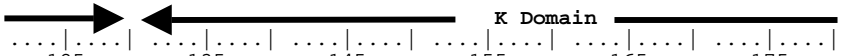

|       |             |             |             |             |             |             |
|-------|-------------|-------------|-------------|-------------|-------------|-------------|
|       | ..... ..... | ..... ..... | ..... ..... | ..... ..... | ..... ..... | ..... ..... |
|       | 125         | 135         | 145         | 155         | 165         | 175         |
| SEP1  | -----ENSY   | REYLKLGKRY  | EN-LQRQQRN  | LLGEDLGPLN  | SKELEQLERQ  | LDGSLKQVRS  |
| SEP2  | -----ENSY   | REYLKLGKRY  | EN-LQRQQRN  | LLGEDLGPLN  | SKELEQLERQ  | LDGSLKQVRC  |
| SEP3  | -----LSSQ   | QEYLKLGKERY | DA-LQRTQRN  | LLGEDLGPLS  | TKELESLELQ  | LDSSLKQIRA  |
| AGL3  | -----QDKY   | QDYLKLKSRV  | EI-LQHSQRH  | LLGEELEEMD  | VNELEHLERQ  | VDASLRQIRS  |
| AGL13 | -----QGLR   | QEVTKLKCKY  | ES-LLRTHRN  | LVGEDLEGMS  | IKELQTLERQ  | LEGALSATRK  |
| AGL6  | -----QSWC   | QEVTKLKSKY  | ES-LVRTNRN  | LLGEDLGEMG  | VKELQALERQ  | LEAALTATRO  |
| CAL   | -----TNWS   | MEYSRLKAKI  | EL-LERNQRH  | YLGEELEPMS  | LKDLQNLQEQ  | LETALKHIRS  |
| AP1   | -----TNWS   | MEYNRLKAKI  | EL-LERNQRH  | YLGEDLQAMS  | PKELQNLQEQ  | LDTALKHIRT  |
| FUL   | -----ENWV   | LEHAKLKARV  | EV-LEKNKRN  | FMGEDLDLSL  | LKELQSLERQ  | LDAAIKSIRS  |
| AGL79 | -----GECs   | TECSKLLRMI  | DV-LQRSLRH  | LRGEEVDGLS  | TRDLQGVEMQ  | LDTALKKTRS  |
| FLF   | -----DHQ    | SKALNYGSHY  | EL-LELVDSK  | LVGSNVKNVS  | IDALVQLEEH  | LETALSVTRA  |
| SHP1  | -----QYYQ   | QESAKLRRQI  | RD-IQNSNRH  | IVGESLGLSN  | FKELKNLEGR  | LEKGISRVRS  |
| SHP2  | -----QYYQ   | QESAKLRRQI  | RD-IQNLNRH  | ILGESLGLSN  | FKELKNLESR  | LEKGISRVRS  |
| AG    | -----QYYQ   | QESAKLRQOI  | IS-IQNSNRQ  | LMGETIGSMS  | PKELRNLEGR  | LERSITRIRS  |
| AGL11 | -----AYYQ   | QESAKLRQOI  | QT-IQNSNRN  | LMGDSLSSLS  | VKELKQVENR  | LEKAISRIRS  |
| AGL12 | -----DPK    | DEINVLKQEI  | EM-LQKGISY  | MFGGGDGAMN  | LEELLLLEKH  | LEYWISQIRS  |
| AGL70 | -----DLA    | EKIRNYLPHK  | EL-LEIVQSK  | LEESNVDNVS  | VDSLISMEEQ  | LETALSVIRA  |
| MAF2I | -----DLA    | EKTRNYLPLK  | EL-LEIVQSK  | LEESNVDNAS  | VDTLISLEEQ  | LETALSVTRA  |
| MAF1  | -----DLE    | EKIQNYLPHK  | EL-LETVQSK  | LEEPNVDNVS  | VDSLISLEEQ  | LETALSVSRA  |

MAF5I -----DLE DKTQDYLSHK EL-LEIVQRK IEEAKGDNVS IESLISMEEQ LKSALSVIRA  
MAF4I -----DLE EKTNLNLSHK EL-LETIQCK IEEAKSDNVS IDCLKSLEEQ LKTALSVRTA  
AGL17 -----KFWQ REAETLRQEL HS-LQENYRQ LTGVELNGLS VKELQNIESQ LEMSLRGIRM  
AGL21 -----KFWQ REAAVLRQEL HA-LQENHRQ MMGEQLNGLS VNELNSLENQ IEISLRGIRM  
ANR1 -----KFWQ REVASLQQQL QY-LQECHRK LVGEEELSGMN ANDLQNLLEDQ LVTSLKGVRL  
AGL16 -----QEMY IVTLEKYAYS EE-L-VLDRQ MMGEEELSGLS VEALQNLLENQ LELSLRGVRM  
AGL15 -----EEDC AEVDILKQDL SK-LQEKLHQ LQGGKLNPLT FKELQSLEQQ LYHALITVRE  
AGL18 -----VLRN DDSMK--GEL ER-LQLAIER LKGKELEGMS FPDLSISLENQ LNESLHSHVKD  
SVP -----LVEN SDHARMSKEI AD-KSHRLRQ MRGEELQGLD IEELQQLLEKA LETGLTRVIE  
AGL24 -----RLEN CNLSRLSKEV ED-KTKQLRK LRGEDLDGLN LEELQRLEKL LESGLSRVSE  
AGL19 -----QAR DETSGLTKKI EQ-LEISKRRK LLGEGIDACS IEELQQLLENQ LDRSLSRIRA  
AGL14 -----QSK DETYGLARKI EH-LEISTRK MMGEGLDASS IEELQQLLENQ LDRSLMKIRA  
SOC1 -----QHLK YEANMMKKI EQ-LEASKRRK LLGEGIGTCS IEELQQLIEQQ LEKSVKCIIRA  
AGL72 -----QGLK KEMVTMVKKI EV-LEVHNRK MMGQSLDSCS VKELSEIATQ IEKSLHMVRL  
AGL71 -----QELK MEIDRMVKKI DL-LEVHHRK LLGQGLDSCS VTELQEIDTQ IEKSLRIVRS  
AGL42 -----QQLK QEASHMITKI EL-LEFHKRRK LLGQGIASCS LEELQEIDSQ LQRSLG----  
PI -----ENLS NEIDRIKKEN DS-LQLELRH LKGEDIQSLN LKNLMAVEHA IEHGLDKVRD  
AP3 -----ERMQ ETKRKLLETN RN-LRTQIKQ RLGECLDELD IQELRRLEDE MENTFKLVRE  
TT16 -----EQLH HEMELLRRET CN-LELRLRP FHHGDLASIP PNELDGLERQ LEHSLVKVRE  
AGL63 -----DCVK -TKESMMREI EN-LKLNQL YDGHGLNLLT YDELLSFEHL LESSLQHARA  
AGL104 -----ECLL RILQQLKTEN DIALQVTNPA AINSVVEELE HE-VCRLQQQ LQ--MA----  
AGL66 SILCMCHYLL RTLQQLKAEN DIALQQLYNY VICNNSEELE HE-VYKLQQQ LL--MA----  
AGL67 -----EYLL RTLEKLIKIED DMALQINIDF GMEMQQLEN FS-WVRTDEN MN--VPI---  
AGL94 -----IDIS KFLDRISTPT VE-VCTTMM LINDSEVSSN SFRDTGIFRC LAKKSDSY--  
AGL30 -----TQAR ILQARISEIH GR-LSYWTEP DKINNVEHLG QLEIS-IRQS LDQ-LRAH--  
AGL65 -----VWID HL-RFMNFLG YFLLSCWTNI DRIENTEHLD LLEES-LRKS IER-IQIH--


  
**C terminal region**

|       | 185        | 195        | 205        | 215     | 225       | 235          |
|-------|------------|------------|------------|---------|-----------|--------------|
| SEP1  | IKTQYMLDQL | SDLQNEQML  | LETNRALAMK | LD----- | -----D--- | -MI-----GVR  |
| SEP2  | IKTQYMLDQL | SDLQKEHIL  | LDANRALSMK | LE----- | -----D--- | -MI-----GVR  |
| SEP3  | LRTQFMLDQL | NDLQSKERML | TETNKTLLRL | LA----- | -----D-G  | YQM-----P-L  |
| AGL3  | TKARSMLDQL | SDLKTKEEML | LETNRDLRRK | LE----- | -----D-S  | DAAL-----T-- |
| AGL13 | QKTQVMMEQM | EELRRKEREL | GDINNKLKLE | TE----- | -----D-H  | DFK-----E-K  |
| AGL6  | RKTQVMMEEM | EDLRKKERQL | GDINKQLKIK | FE----- | -----TEGH | AFK-----T--  |
| CAL   | RKNQLMNESL | NHLQRKEKEI | QEENSMLTKQ | IK----- | -----E--  | --R-----E-N  |
| AP1   | RKNQLMYESI | NELQKKEKAI | QEONSMLSQ  | IK----- | -----E--  | --R-----E-K  |
| FUL   | RKNQAMFESI | SALQKKDKAL | QDHNNSSLKK | IK----- | -----E-R  | EKK-----T--  |
| AGL79 | RKNQLMVESI | AQLQKKEKEL | KELKKQLTKK | VK----- | -----A-G  | ER-----E--   |
| FLF   | KKTELLMLLV | ENLKEKEKML | KEENQVLASQ | ME----- | -----     | -----N--     |
| SHP1  | KKNELLVAEI | EYMQKREMEI | QHNNMYLRAK | IA----- | -----EG   | ARL-----NPD  |
| SHP2  | KKHEMLVAEI | EYMQKREIEL | QNDNMYLRSK | IT----- | -----ER   | TGL-----Q--  |
| AG    | KKNELLFSEI | DYMQKREVDI | HNDNQILRAK | IA----- | -----EN   | ERN-----N--  |
| AGL11 | KKHELLLVEI | ENAQKREIEL | DNENIYLRTK | VA----- | -----EV   | ER-----      |
| AGL12 | AKMDVMLQEI | QSLRNKEGVL | KNTNKYLLDK | IE----- | -----NN   | -----        |
| AGL70 | KKTELLMEDM | KSLQERKELL | IEENQILASQ | VG----- | -----     | -----K--     |
| MAF2I | RKTELLMGEV | KSLQKTENLL | REENQTLASQ | VG----- | -----     | -----K--     |
| MAF1  | RKAELMMEYI | ESLKEKEKLL | REENQVLASQ | MG----- | -----     | -----K--     |
| MAF5I | RKTELLMELV | KNLQDKEKLL | KEKNKVLASE | VG----- | -----     | -KL-----K--  |
| MAF4I | RKTELLMELV | KTHQEKEKLL | REENQSLTNQ | LI----- | -----KM   | GKM-----K--  |
| AGL17 | KREQILTNEI | KELTRKRNLV | HHENLELSRK | VQ----- | -----RI   | -----        |
| AGL21 | RKEQLLTQEI | QELSQKRNL  | HQENLDLSRK | VQ----- | -----RI   | -----        |
| ANR1  | KKDQMLTNEI | RELNRKGGQI | QKENHELQNI | VD----- | -----IM   | RKE-----N--  |
| AGL16 | KKDQMLIEEI | QVLNREGNLV | HQENLDLHKK | VN----- | -----LM   | -----        |
| AGL15 | RKERLLTNQL | EESRLKEQRA | ELENETLRRQ | VQ----- | -----EL   | RSFL-P----   |
| AGL18 | QKTQILLNQI | ERSRIQEKA  | LEENQILRKQ | V-----  | -----     | -EML-G----   |
| SVP   | TKSDKIMSEI | SELQKKGML  | MDENKRLRQQ | VC----- | -----VL   | -----        |
| AGL24 | KKGECVMSQI | FSLKRGSEL  | VDENKRLRDK | LE----- | -----TL   | -----        |

```

AGL19      KKYQLLREEI  EKLKAEERNL  VKENKDLKEK  WL-----  -----GM  -----
AGL14      KKYQLLREET  EKLKEKERNL  IAENKMLMEK  CE-----  -----MQ  -----
SOC1       RKTQVFKEQI  EQLKQKEKAL  AAENEKLESEK  WG-----  -----SH  -----
AGL72      RKAKLYEDEL  QKLKAKEREL  KDERVRLSLK  KT-----  -----IY  -----
AGL71      RKAELYADQL  KKLKEKEREL  LNE--RKRL  EE-----  -----VN  -----
AGL42      -KAQLFKEQL  EKLKAKEKQL  LEENVKLBHQK  NV-----  -----IN  -----
PI         HQMEILISK-  ---RRNEKMM  AEEQRQLTFQ  LQ-----  -----Q-  -----Q-
AP3        RKFKSLGNQI  ETTKKNKSQ  QDIQKNLIHE  LE-----  -----L-  -----R-
TT16      RKNELMQOQL  ENLSRKRRL  EEDNNMYRW  LH-----  -----EH  RAAM-EFQQ-
AGL63      RKSEFMHQOQ  QQ-QTDQKLK  GKEKGQGSW  EQ-----  -----L  M-----
AGL104     -----EEL  RRYEPDP--I  RFTTMEYEV  SE--KQLLDT  LTHVQRRDH  LMSN-HLSSY
AGL66     -----EEL  MKYEPDP--I  RFTTMEYET  CE--KQLMDT  LTRVNQRREH  ILSQDQLSSY
AGL67     -----EED  PNLQLHH--M  YKIDITCSASS  AL-----  -----GNY  SGLF-SKSSD
AGL94     -----WTDV  DNIDSVD--V  LQLEHSLRQ  SLAQIYGRKA  SMPQRQQOQL  MSSQ--CKNQT
AGL30     -----KMQ  DGI-QIP--L  EQLQSMSWI  LN-----  -----
AGL65     -----KEH  YRK-NQL--L  PIECAFHSGI  QLPFMFGSYPG  YFGT-----  -----

```

```

.....|.....| .....|.....| .....|.....| .....|.....| .....|.....|
      245      255      265      275      285      295
SEP1      SHHGGG--WE  GGEQ-----  -NVTYAHHQA  Q-SQGL-YQP  -----  LECNPTLQMG
SEP2      HHHIGGG-WE  GGDQQ-----  -NIAYGHPQA  H-SQGL-YQS  -----  LECDPFLQIG
SEP3      QLNPNQEEVD  HYGRH-----  -HHQQQQH--  --SQAF-FQP  -----  LECEPILQIG
AGL3      -----QSF  W  SSAAEQQQH  QQQQQGMSY  Q-SNPP-IQE  A-----  GFFKP-LQ-G
AGL13     --GF-QDLLL  NPVLTAG---  --CSTDFSL-  Q-STHONYIS  D-----  CNLGYFYRLG
AGL6      ---F-QDLWA  NSAASVAG--  DPNNSEFPVE  P-SHPN--VL  D-----  CNTEPFLQIG
CAL       ILKTKQTQCE  ---QLNRSV  DDVP-QPQPF  Q--HPHLYMI  A-----  HQTSPFLNMG
AP1       ILRAQQEQWD  -QQNQGHNMP  PPLPPQQHQI  Q--HP--YML  S-----  HQPSPFLNMG
FUL       --G--QEGGQ  LVQCSNSS--  -SVL-LPQYC  VTS-----  -----  SRDGFVERVG
AGL79     --DF-QTQNL  SHDLASLATP  PFESPHELRR  TIS-P-----  -----  -PPPLSSG
FLF       --N--HHVGA  EAEMEMS---  ---PAGQIS  DNLP-----  -----  -VTLPLLN--
SHP1      QQE--SSVIQ  GTTVYES---  ---GVSSHD  QSQH-----  -----  -YNRNYIPVN
SHP2      QQE--SSVIH  QGTVYES---  ---GVTSSH  QSGQ-----  -----  -YNRNYIAVN
AG        -PS--ISLMP  GGSNYEQ---  ---LMPPPQ  TQSQPF-----  -----  -DSRNYFOVA
AGL11     --Y--QHHH  QMVSQSE---  ---INATEA  LASRN-----  -----  YFAHSIMTAG
AGL12     --N--SILDA  NFAVMET---  ---NYSYP  LTMP-----  -----  --SEIFQF--
AGL70     --K--TFLVI  EGDRGMS---  ---RENGSG  NKVP-----  -----  -ETLSLLK--
MAF2I     --K--TFLVI  EGDRGMS---  ---WENGSG  NKVR-----  -----  -ETLPLLK--
MAF1      --N--TLLAT  DDERGMF---  ---PGSSSG  NKIP-----  -----  -ETLPLLN--
MAF5I     --K--ILETG  DERAVMS---  ---PENSSG  HSPP-----  -----  -ETLPLLK--
MAF4I     --K--SVEAE  DARAMS---  ---PESSD  NKPP-----  -----  -ETLPLLK--
AGL17     --H--QENVE  LYKKAYG---  ---TSNTNG  LGHH-----  --ELVDVAYE  SHAQVRLQLS
AGL21     --H--QENVE  LYKKAYG---  ---MANTNG  FTHR-----  --EVAVADDE  SHTQIRLQLS
ANR1      IKL--QKKVH  GRTNAIEG--  ---NSSVDP  ISNG-----  -TT        TYAPPQLQLI
AGL16     --H--QQNME  LHEKVSE---  ---VEGVKI  ANKNSLLT--  --NGLDMRDT  SNEHVHLQLS
AGL15     -SF--THYVP  SYIKCFAID-  ---PKNALI  NHDSKCS---  -----LQN  TDSDTTLQLG
AGL18     -RG--SGPKV  LNERPQDSS-  ---P-----  ADPE-----  -----SSS  SEEDENDNEE
SVP       --P--SLLIT  NPFLLSLST-  ---INVHTP  KFNP-----  -----  QLSTTHMFDH
AGL24     --E--RAKLT  TLKEALE---  ---TESVTT  NVSS-----  -----  YDSGTPLEDD
AGL19     --G--TATIA  SSQSTLS---  ---SSEVNI  DDN-----  -----  MEVETGLFIG
AGL14     --G--RGIIG  RISSSSS---  ---TSELDI  DDNE-----  -----  MEVVTDLFIG
SOC1      --E--SEVWS  NKNQEST---  ---GRGDEE  SSPS-----  -----  SEVETQLFIG
AGL72     --T--HLCQV  GERPMGM---  ---PSG---  SKEK-----  -----  EDVETDLFIG
AGL71     --M--HHSSK  GNTTEGGH---  ---R-----  TKHS-----  -----  SEVETDLFIG
AGL42     --P--WRGSS  TDQQQEK---  ---YKV---  IDLN-----  -----  LEVETDLFIG
PI        -----E---  MAIASNARGM  MMRDHDGQ--  -----  -----  FGYR
AP3       -----AEDP  HYGLVDNG--  -G----DYDS  V-LGYQIE--  -----  --GSRAYALR
TT16     -----A---  GIDTKPGEYQ  QFIEQLQCY-  -----  -----  -----KP
AGL63     --W--QAERQ  MMTCQRQ---  ---KDPAPA  NEGG-----  -----  --VPFLRWG

```

|        |            |            |            |            |            |            |
|--------|------------|------------|------------|------------|------------|------------|
| AGL104 | EAS--TMQPN | IGGPFVNDVV | EGWLPENGTN | QTHLFDASAH | SNQLRELSSA | MYEPLLQGS  |
| AGL66  | EASALQQQQS | MGGPFVNDVV | GGWLTENGN  | EAHLFDASAH | SAMYET---- | ----LLQGS  |
| AGL67  | ILQ--KLETG | SIPGTSADPN | QQFSNLSFLN | DQKQKQLAEW | NLLG-SPADY | YVSQILEASY |
| AGL94  | EID--AMGGN | SSMQEAHSM  | WLPDNDHQQT | ILPGDSSFLP | HREMDGSIPV | YSSCFESTK  |
| AGL30  | --S--NTTNI | VTEEHNS--- | --IPQREVEC | SAS-----   | -----      | SSEPRFIPH- |
| AGL65  | -----GK    | SPEMTIPGQE | TSF-LDELNT | GQ--LKQDTS | SQQQFTNNNN | ITAYNPNLHN |

|        | .... ....  | .... ....  | .... ....   | .... ....   | .... ....   | .... ....  |
|--------|------------|------------|-------------|-------------|-------------|------------|
|        | 305        | 315        | 325         | 335         | 345         | 355        |
| SEP1   | YDNPVCS-E- | --QITATTQA | Q-----      | ---AQPGNG   | YIP-GWML--  | -----      |
| SEP2   | YSHPVCS-E- | --QMAVTVQG | Q-----      | ---SQQGNG   | YIP-GWML--  | -----      |
| SEP3   | YQGQQDG-M- | --GAGPSV-- | -----       | -----NN     | YML-GWLPYD  | TNSI-----  |
| AGL3   | NVALQMSSHY | N-----HNPA | N-----ATN   | SATTSQNVNG  | FFP-GWMV--  | -----      |
| AGL13  | FNN-----   | --TMSKVVDL | R-----      | -----       | -----       | -----      |
| AGL6   | FQQ-----   | --HYVQGE   | S-----SV    | SKSNVAGETN  | FVQ-GWVL--  | -----      |
| CAL    | GLYQ-----  | --GEDQTAMR | R-----NN    | LDLTLEPIYN  | Y-L-GCYAA-  | -----      |
| AP1    | GLYQ-----  | --EDDPMAMR | -----ND     | LELTLEPVYN  | CNL-GCFAA-  | -----      |
| FUL    | GENGG----- | --ASSLTEPN | S-----      | ---LLPA--   | ---WMLRP    | TTTNE----- |
| AGL79  | DTS-----   | ---QRDGV   | G-----EV    | AAGTLIRRTN  | ATLPHWMPQL  | TGE-----   |
| FLF    | -----      | -----      | -----       | -----       | -----       | -----      |
| SHP1   | LLEPN----- | ---QFSG    | Q-----DQ    | PP-----LQ   | LV-----     | -----      |
| SHP2   | LLEPN----- | ---QNSSN   | Q-----DQ    | PP-----LQ   | LV-----     | -----      |
| AG     | ALQPNN---- | --HHYSSAGR | Q-----DQ    | TA-----LQ   | LV-----     | -----      |
| AGL11  | SGS-----   | ---GNGGS   | YS-----DP   | DK-----KI   | LHLG-----   | -----      |
| AGL12  | -----      | -----      | -----       | -----       | -----       | -----      |
| AGL70  | -----      | -----      | -----       | -----       | -----       | -----      |
| MAF2I  | -----      | -----      | -----       | -----       | -----       | -----      |
| MAF1   | -----      | -----      | -----       | -----       | -----       | -----      |
| MAF5I  | -----      | -----      | -----       | -----       | -----       | -----      |
| MAF4I  | -----      | -----      | -----       | -----       | -----       | -----      |
| AGL17  | QPE-----   | ---QSHYK   | T-----SS    | NS-----     | -----       | -----      |
| AGL21  | QPE-----   | ---HSDYD   | T-----PP    | RANE-----   | -----       | -----      |
| ANR1   | QLQP-----  | ---APREK   | S-----      | ---IRLG     | LQLS-----   | -----      |
| AGL16  | QP-----    | ---QHDHE   | T-----HS    | KAIQLNYFSF  | IA-----     | -----      |
| AGL15  | LPGEAHD-RR | TNEGERESPS | SDSVTTNTSS  | ETAERGDQSS  | LANSPPPEAKR | QRFSV----- |
| AGL18  | HHSDTSL-QL | G----LSSTG | YCTKRKKPKI  | ELVC-----   | DNSGSQVASD  | -----      |
| SVP    | TV-----    | ---R---    | -----       | -----       | -----       | -----      |
| AGL24  | SD-----    | ---TSLK    | L-----GL    | PSWE-----   | -----       | -----      |
| AGL19  | PPE-----   | ---TRQS    | K-----KF    | PPQN-----   | -----       | -----      |
| AGL14  | PPE-----   | ---TRHF    | K-----KF    | PPSN-----   | -----       | -----      |
| SQC1   | LPC-----   | ---SSRK-   | -----       | -----       | -----       | -----      |
| AGL72  | FLK-----   | ---NRP-    | -----       | -----       | -----       | -----      |
| AGL71  | LPV-----   | ---TRL-    | -----       | -----       | -----       | -----      |
| AGL42  | LP-----    | ---NRNC    | -----       | -----       | -----       | -----      |
| PI     | VQPI-----  | ---QPN     | -----LQ     | ---EKIMS    | LVID-----   | -----      |
| AP3    | FHQN-----  | ---HHHYYPN | ---HGLH     | APSASDIITF  | HILLE-----  | -----      |
| TT16   | --GE-----  | ---YQQ     | -----FL     | ---EQQQQ    | QPNSVLQLAT  | LPSEIDPTYN |
| AGL63  | TTHR-----  | ---RSSPP   | -----       | -----       | -----       | -----      |
| AGL104 | SSSNQNN-MS | ECHVTNHNGE | MFPEWAQAYS  | SSALFASMQQ  | QHEGVGPSIE  | EMMPAQQSDI |
| AGL66  | SSSNQNNIMG | ESNVSNHNGD | MFQEWQAQAYN | STAHNPSTL   | FPPMQHQHGL  | VVDPNIEEIE |
| AGL67  | KPQIGGK-NN | GASSETLPYV | AVFDDPLYFW  | VNNGFLI IHL | FSKLCYYWSC  | FADCF----- |
| AGL94  | PDQICS-NP  | GQQFEQLEQQ | GNGCLGLQQL  | GEEYSYPTPF  | GTTLGMEEDQ  | EKKIKSEMEL |
| AGL30  | -----      | -----      | -----       | -----       | -----       | -----      |
| AGL65  | DMNHHQTLPP | PPLPLTLPHA | QVYIPMNQRE  | YHMNGFFEAP  | PPDSSAYNDN  | TNQTRFGSSS |

|        | ..... ..... | ..... ..... | ..... ..... | ..... ..... | ..... ..... | ..... ..... |
|--------|-------------|-------------|-------------|-------------|-------------|-------------|
|        | 365         | 375         | 385         | 395         | 405         | 415         |
| SEP1   | -----       | -----       | -----       | -----       | -----       | -----       |
| SEP2   | -----       | -----       | -----       | -----       | -----       | -----       |
| SEP3   | -----       | -----       | -----       | -----       | -----       | -----       |
| AGL3   | -----       | -----       | -----       | -----       | -----       | -----       |
| AGL13  | -----       | -----       | -----       | -----       | -----       | -----       |
| AGL6   | -----       | -----       | -----       | -----       | -----       | -----       |
| CAL    | -----       | -----       | -----       | -----       | -----       | -----       |
| AP1    | -----       | -----       | -----       | -----       | -----       | -----       |
| FUL    | -----       | -----       | -----       | -----       | -----       | -----       |
| AGL79  | -----       | -----       | -----       | -----       | -----       | -----       |
| FLF    | -----       | -----       | -----       | -----       | -----       | -----       |
| SHP1   | -----       | -----       | -----       | -----       | -----       | -----       |
| SHP2   | -----       | -----       | -----       | -----       | -----       | -----       |
| AG     | -----       | -----       | -----       | -----       | -----       | -----       |
| AGL11  | -----       | -----       | -----       | -----       | -----       | -----       |
| AGL12  | -----       | -----       | -----       | -----       | -----       | -----       |
| AGL70  | -----       | -----       | -----       | -----       | -----       | -----       |
| MAF2I  | -----       | -----       | -----       | -----       | -----       | -----       |
| MAF1   | -----       | -----       | -----       | -----       | -----       | -----       |
| MAF5I  | -----       | -----       | -----       | -----       | -----       | -----       |
| MAF4I  | -----       | -----       | -----       | -----       | -----       | -----       |
| AGL17  | -----       | -----       | -----       | -----       | -----       | -----       |
| AGL21  | -----       | -----       | -----       | -----       | -----       | -----       |
| ANR1   | -----       | -----       | -----       | -----       | -----       | -----       |
| AGL16  | -----       | -----       | -----       | -----       | -----       | -----       |
| AGL15  | -----       | -----       | -----       | -----       | -----       | -----       |
| AGL18  | -----       | -----       | -----       | -----       | -----       | -----       |
| SVP    | -----       | -----       | -----       | -----       | -----       | -----       |
| AGL24  | -----       | -----       | -----       | -----       | -----       | -----       |
| AGL19  | -----       | -----       | -----       | -----       | -----       | -----       |
| AGL14  | -----       | -----       | -----       | -----       | -----       | -----       |
| SOC1   | -----       | -----       | -----       | -----       | -----       | -----       |
| AGL72  | -----       | -----       | -----       | -----       | -----       | -----       |
| AGL71  | -----       | -----       | -----       | -----       | -----       | -----       |
| AGL42  | -----       | -----       | -----       | -----       | -----       | -----       |
| PI     | -----       | -----       | -----       | -----       | -----       | -----       |
| AP3    | -----       | -----       | -----       | -----       | -----       | -----       |
| TT16   | LQLAQPNLQN  | DPTAQND---  | -----       | -----       | -----       | -----       |
| AGL63  | -----       | -----       | -----       | -----       | -----       | -----       |
| AGL104 | PG-VTAETQV  | DHEVSDYETK  | VPQLSSQ---  | -----       | -----       | -----       |
| AGL66  | IPVMKKDAQA  | DHEVSDYDIR  | MPQLSSQ---  | -----       | -----       | -----       |
| AGL67  | -----       | -----       | -----       | -----       | -----       | -----       |
| AGL94  | NNLQQQQQQQ  | QQQQQQDPSM  | YDPMANNNGG  | CFQIPHDQSM  | FVNDHHHHHH  | HHHQNWVPDS  |
| AGL30  | -----       | -----       | -----       | -----       | -----       | -----       |
| AGL65  | SSLPCSISMF  | DEYLFSQMQQ  | PN-----     | -----       | -----       | -----       |

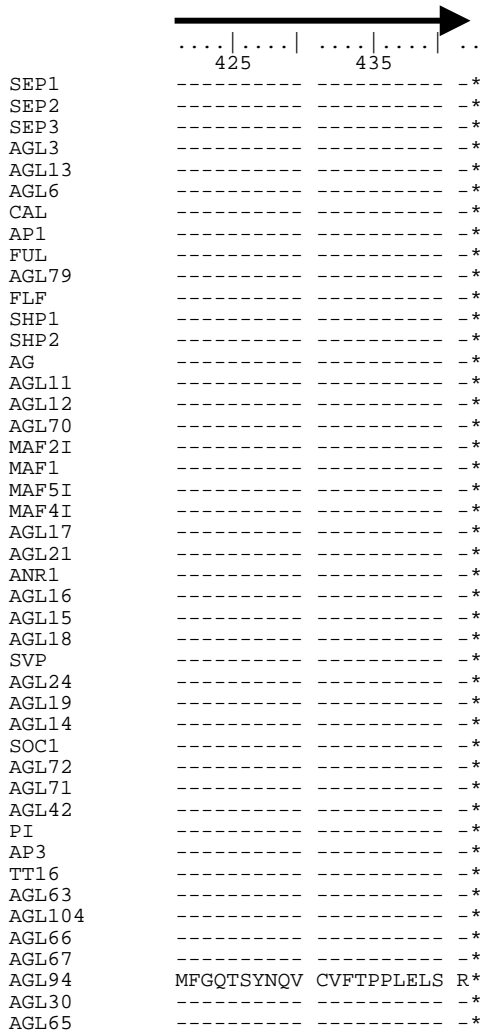

The 5' of agamous and related sequences has been excluded.
